# Supplementary material for: Physical Fitness, Physical Activity, Sedentary Behavior, or Diet—What Are the Correlates of Obesity in Polish School Children?
Source: Int J Environ Res Public Health. 2017 Jun 20;14(6):664. doi: 10.3390/ijerph14060664 (PMC5486350; doi:10.3390/ijerph14060664)
Supplement: Supplementary file 1 [file ijerph-14-00664-s001.xls]

## Sheet: raw data
No	Agegroup	City=1,Rural=2	Age (years)	Sex	Height (m)	Height cm	Body mass(kg)	BMI	BMIkat	Triceps skinfold (cm) mean	Subscapular skinfold (cm, mean)	%BF	waist girth (cm)	hip girth (cm)	WHR	Waist to height	Flexibility (cm)	Sit-ups (1/min)	Standing long jump (cm)	Push-ups(1/min)	Shuttle run (ilość pokonanych 20 m odcinków)	Velocity	VO2max	Dynamometr (RH)	Dynamometer (LH)	Dynam mean	Running	Play ball	Walking	Mixed walking-running	Cycling	Outdoor games and plays	Climbing	Basketball	Roller - skating	Volleyball	Swimming	Soccer	Jump rope	Dancing	Other	TV/Computer/Movies	Computer palying	Reading	Music	Playboard games	Dishes and kitchen	Talking on phone	Cleaning
1	3	1	14	0	1.56	156	41	16.8475	0	11.6	6.6	20.314	55	78	0.705128	0.352564	50	35	125	22	26	9.5	36.7428	24	24	24	2	1	3	2	2	1	1	2	2	2	2	1	1	3	0	3	5	4	4	1	2	3	2
2	3	1	13	0	1.61	161	63	24.3046	2	24.2	18.4667	49.9187	76	103	0.737864	0.47205	26	36	121	13	10	9	35.9142	28	28	28	2	2	3	2	3	3	2	2	2	2	2	2	3	2	0	2	2	3	4	1	1	1	2
3	3	1	14	0	1.59	159	59	23.3377	2	20.8	19	46.45	74	96	0.770833	0.465409	29	47	102	22	16	9	34.0486	30	20	25	3	3	2	2	2	3	1	3	3	2	1	2	2	2	0	4	3	2	3	1	1	2	2
4	3	1	13	0	1.62	162	50	19.052	1	10	9.06667	21.3627	65	89	0.730337	0.401235	44	54	166	31	54	11	46.3838	29	27	28	2	2	3	2	2	2	2	2	2	2	2	2	2	2	3szermierka	2	2	4	2	1	1	1	2
5	3	1	13	1	1.56	156	57	23.4221	2	22.6667	12.6667	41.0453	79	99	0.79798	0.50641	30	60	200	25	52	11	46.3838	32	32	32	2	3	3	2	2	3	1	2	1	2	2	3	1	2	0	2	4	1	1	1	1	2	1
6	3	1	13	1	1.69	169	71	24.8591	2	29.4667	25.0667	64.2773	92	100	0.92	0.544379	18	26	80	1	11	8.5	33.2968	26	26	26	2	3	2	1	2	3	1	2	1	2	2	3	1	2	0	2	3	1	1	5	1	1	1
7	3	1	13	1	1.72	172	88	29.7458	3	24	25.1333	57.7433	94	110	0.854545	0.546512	28	45	116	11	10	8.5	33.2968	34	42	38	2	2	1	1	2	3	1	2	1	2	2	1	1	2	0	1	5	1	5	1	1	1	1
8	3	1	13	1	1.65	165	55	20.202	1	10.6	7.8	20.556	77	88	0.875	0.466667	38	63	206	19	82	12	51.6186	40	35	37.5	3	3	3	2	2	3	1	3	1	3	3	3	1	3	0	2	5	3	3	1	0	1	1
9	3	1	14	0	1.72	172	99	33.464	3	37.4667	42.4667	95.0113	97	121	0.801653	0.563953	24	23	90	3	10	8.5	31.3544	30	28	29	1	1	3	1	2	2	2	2	1	1	2	1	1	2	0	1	5	3	5	1	1	5	1
10	3	1	13	0	1.59	159	43	17.0088	1	11.3333	9.4	23.3793	65	87	0.747126	0.408805	27	58	160	26	63	11.5	49.0012	26	26	26	2	2	3	2	2	2	2	2	2	2	3	1	1	2	0	1	3	1	1	1	1	1	2
11	3	1	13	0	1.59	159	35	13.8444	0	12	5.73333	19.7493	60	76	0.789474	0.377358	33	53	160	31	40	10.5	43.7664	26	24	25	2	2	3	2	2	2	2	2	2	2	2	1	1	2	0	1	2	1	1	1	1	1	2
12	3	1	13	0	1.6	160	55	21.4844	1	16.2667	10.2	30.3167	71	96	0.739583	0.44375	46	48	145	11	34	10	41.149	31	24	27.5	3	2	3	2	2	3	2	2	2	2	2	2	2	3	0	3	4	3	4	1	1	1	2
13	3	1	14	0	1.65	165	43	15.7943	0	16.6	8.46667	28.6227	63	90	0.7	0.381818	32	30	148	12	31	10	39.437	27	24	25.5	2	3	3	3	2	3	2	2	1	2	2	2	2	3	0	4	3	5	2	2	1	2	1
14	3	1	13	0	1.66	166	56.5	20.5037	1	20.0667	14.4667	40.0773	69	100	0.69	0.415663	29	40	130	7	31	10	41.149	24	24	24	2	2	3	2	2	2	2	2	2	2	2	1	2	2	2tenisziemny	3	5	3	5	1	2	3	3
15	3	1	14	0	1.66	166	46	16.6933	0	12.4667	10.8	26.4447	64	89	0.719101	0.385542	34	44	122	1	19	9	34.0486	34	32	33	2	2	2	2	2	2	1	1	2	2	2	1	1	1	3gimnastyka	1	2	1	2	1	1	1	1
16	3	1	14	0	1.72	172	62	20.9573	1	17.2	19.4	42.578	88	99	0.888889	0.511628	34	47	130	23	31	10	39.437	17	20	18.5	2	2	3	3	2	2	2	2	2	2	2	2	2	2	0	3	3	3	4	1	1	1	1
17	3	1	13	1	1.59	159	50	19.7777	1	13	9.86667	25.9607	66	86	0.767442	0.415094	24	50	175	32	46	10.5	43.7664	28	26	27	3	2	3	2	2	2	1	2	2	2	2	2	1	2	3tenis	2	3	1	3	1	2	1	1
18	3	1	13	0	1.69	169	53	18.5568	1	16.4667	13.7333	34.834	70	94	0.744681	0.414201	24	40	115	11	16	9	35.9142	15	16	15.5	3	2	3	3	2	2	2	2	2	2	2	1	1	2	3jazdakonna	1	3	1	3	1	1	1	1
19	3	1	14	0	1.63	163	59	22.2063	1	17.4	16.4	39.19	69	96	0.71875	0.423313	27	34	152	7	18	9	34.0486	22	24	23	2	2	3	3	2	2	2	2	2	2	2	2	2	2	0	2	3	3	4	1	1	2	3
20	3	1	13	1	1.73	173	57	19.0451	1	15.8667	9.86667	29.4293	73	96	0.760417	0.421965	18	56	118	32	47	10.5	43.7664	37	34	35.5	2	2	3	2	2	2	2	2	1	1	2	2	2	2	2tenis	4	5	3	4	1	2	1	2
21	3	1	13	1	1.76	176	63.5	20.4997	1				71	98	0.72449	0.403409	24	52	190	36	42	10.5	43.7664			0	2	2	3	2	3	2	1	1	2	2	1	1	1	2	0	3	5	4	4	1	1	1	2
22	3	1	13	1	1.75	175	80	26.1224	2	19.8	16.8667	42.6587	86	104	0.826923	0.491429	25	45	168	26	16	9	35.9142	34	31	32.5	2	2	3	1	2	2	2	3	1	2	2	2	1	2	0	2	3	1	2	1	1	1	2
23	3	1	14	1	1.63	163	51.5	19.3835	1	10.2	8.53333	20.9593	68	88	0.772727	0.417178	29	53	210	32	32	10	39.437	36	38	37	2	2	2	1	3	2	1	2	2	2	2	1	1	2	0	1	3	3	3	1	1	1	2
24	3	1	14	0	1.525	152.5	41	17.6297	1	11.1333	8.86667	22.492	62	83	0.746988	0.406557	19	61	148	31	28	9.5	36.7428	22	24	23	2	2	3	3	2	3	2	1	1	2	1	1	2	3	0	3	5	3	3	1	1	1	1
25	3	1	14	0	1.6	160	44	17.1875	1	14.3333	10.2667	28.058	67	87	0.770115	0.41875	36	52	198	31	28	9.5	36.7428	28	24	26	3	2	3	3	2	2	2	2	2	2	2	1	2	3	0	2	3	4	5	2	1	1	3
26	3	1	13	0	1.59	159	53	20.9644	1	14.4667	15.9333	35.076	68	92	0.73913	0.427673	32	47	144	34	26	9.5	38.5316	24	24	24	2	2	3	3	2	3	1	3	3	2	2	2	3	3	0	2	1	4	3	1	1	1	1
27	3	1	14	0	1.69	169	52	18.2066	1				66	92	0.717391	0.390533	39	71	186	47	40	10.5	42.1312			0	3	3	2	2	2	2	1	1	2	3	1	1	1	1	2jazdakonna	1	4	3	3	1	1	4	1
28	3	1	13	0	1.585	158.5	43	17.1163	1	11.2667	6.46667	19.7493	63	81	0.777778	0.397476	14	41	170	43	81	12	51.6186	26	24	25	2	2	3	2	2	2	2	2	2	2	2	1	2	2	0	4	3	2	1	2	1	2	2
29	3	1	14	1	1.72	172	59	19.9432	1	9.13333	6.8	17.5713	72	96	0.75	0.418605	27	55	205	41	87	12	50.2138	34	34	34	2	2	3	1	2	3	1	2	2	2	2	2	2	2	0	5	3	3	4	1	1	1	3
30	3	1	13	1	1.65	165	43.5	15.978	1	7.66667	5.8	14.5867	68	90	0.755556	0.412121	18	48	180	23	76	12	51.6186	31	30	30.5	2	1	3	2	1	1	1	1	1	1	2	1	1	2	0	2	3	1	1	1	2	1	2
31	3	1	13	1	1.65	165	85	31.2213	3	30.4667	28.2	69.2787	98	114	0.859649	0.593939	26	46	179	19	30	10	41.149	39	38	38.5	2	3	3	2	3	3	1	1	2	2	2	2	1	2	0	2	3	1	2	1	2	1	3
32	3	1	14	1	1.68	168	50	17.7154	1	12.5333	8.4	23.6213	70	83	0.843373	0.416667	4	50	160	34	22	9.5	36.7428	25	23	24	2	1	3	2	2	3	2	1	2	1	2	1	1	1	3treningwieczorem	2	4	1	5	1	1	2	1
33	3	1	14	0	1.59	159	41	16.2177	0	12.3333	7.73333	22.5727	59	83	0.710843	0.371069	39	50	187	27	42	10.5	42.1312	26	22	24	1	1	2	1	1	1	1	2	1	1	1	1	1	1	2jazdakonna	1	1	1	1	1	1	1	1
34	3	1	14	1	1.795	179.5	75.5	23.4325	2	25.6667	29.4	64.9227	85	105	0.809524	0.473538	20	31	168	24	32	10	39.437	40	33	36.5	2	3	3	2	2	3	1	3	2	3	2	2	1	1	0	3	2	3	2	1	1	1	1
35	3	1	14	1	1.81	181	80	24.4193	2	26.4667	17.4	51.3707	79	102	0.77451	0.436464	39	52	220	29	50	11	44.8254	44	44	44	2	2	2	2	2	2	2	2	2	2	2	3	2	2	0	1	5	1	2	1	1	1	1
36	3	1	13	1	1.675	167.5	53.5	19.0688	1	12.0667	7.6	22.0887	68	88	0.772727	0.40597	27	56	197	33	50	11	46.3838	42	38	40	3	3	3	3	3	3	1	1	3	1	1	3	2	1	0	3	5	1	1	1	1	1	3
37	3	1	13	0	1.585	158.5	53	21.0968	1	14	15.3333	33.7853	66	92	0.717391	0.416404	24	46	160	31	26	9.5	38.5316	28	26	27	3	2	3	3	2	2	2	2	3	2	2	1	2	3	2jazdakonna	3	5	4	2	2	3	2	4
38	3	1	13	1	1.705	170.5	62	21.3276	1	26.2667	16.4	49.9187	84	99	0.848485	0.492669	24	38	121	3	12	9	35.9142	36	34	35	2	0	3	2	3	3	1	3	1	2	3	2	1	3	0	2	4	2	1	2	1	2	1
39	3	1	13	1	1.53	153	55	23.4952	2	26.5333	34.4667	72.102	87	94	0.925532	0.568627	26	49	138	3	33	10	41.149	24	22	23	2	2	2	2	3	3	3	2	2	2	3	2	1	3	0	3	3	3	1	2	1	1	1
40	3	1	14	1	1.63	163	53.5	20.1362	1	13.6	8.8	25.396	74	94	0.787234	0.453988	24	44	165	16	12	8.5	31.3544	21	24	22.5	2	3	3	2	3	3	2	3	1	2	3	3	1	3	0	4	5	3	2	2	1	2	3
41	3	1	13	1	1.51	151	40	17.5431	1	13.9333	9.26667	26.364	63	80	0.7875	0.417219	30	55	191	26	33	10	41.149	25	22	23.5	2	3	2	2	2	2	2	3	2	3	2	3	2	2	0	4	4	2	1	1	1	1	2
42	3	1	14	1	1.63	163	45	16.937	1	9.93333	6.2	17.8133	64	83	0.771084	0.392638	20	50	147	10	18	9	34.0486	23	21	22	2	2	2	2	2	1	2	2	1	1	1	2	1	1	0	2	3	1	3	1	1	3	1
43	3	1	14	0	1.63	163	60	22.5827	1	25.7333	28.1333	63.4707	79	101	0.782178	0.484663	50	40	152	36	25	9.5	36.7428	38	35	36.5	3	1	3	2	2	3	1	2	2	2	3	2	2	1	0	3	3	2	5	1	2	4	2
44	3	1	14	0	1.67	167	55.5	19.9003	1	17.2667	10.6667	32.0913	69	97	0.71134	0.413174	28	42	158	20	32	10	39.437	26	29	27.5	2	2	3	2	2	2	2	2	2	2	2	2	2	2	2wspinaczka	2	3	1	4	1	1	2	2
45	3	1	13	0	1.695	169.5	51	17.7513	1	15	9	27.332	65	86	0.755814	0.383481	22	41	161	17	16	9	35.9142	33	26	29.5	2	2	3	2	2	2	1	2	1	2	2	1	2	2	2jazdakonna	4	5	5	5	1	1	1	1
46	3	1	14	0	1.59	159	42	16.6133	0	11.8667	8.06667	22.4113	58	86	0.674419	0.36478	20	50	165	14	21	9	34.0486	25	21	23	2	2	3	2	2	3	1	2	3	2	2	2	2	2	0	2	4	2	4	1	1	5	2
47	3	1	13	0	1.58	158	53.5	21.4309	1	15.8	14.1333	34.5113	72	90	0.8	0.455696	43	44	171	8	16	9	35.9142	30	24	27	3	2	3	3	2	3	2	2	2	2	2	1	2	2	0	2	3	3	1	1	1	1	2
48	3	1	14	0	1.63	163	51	19.1953	1	12.4	14.4667	30.8007	71	89	0.797753	0.435583	34	48	189	19	32	10	39.437	32	26	29	2	2	3	3	2	2	1	2	1	2	1	2	1	2	0	1	2	3	1	1	1	1	1
49	3	1	13	0	1.63	163	47	17.6898	1	12.2	10.6667	25.9607	65	93	0.698925	0.398773	11	48	163	10	40	10.5	43.7664	31	29	30	2	2	3	2	2	2	2	2	2	2	2	2	2	2	2jazdakonna	1	3	2	1	1	1	1	2
50	3	1	13	0	1.68	168	59	20.9042	1	20.5333	14.6667	40.884	76	96	0.791667	0.452381	32	53	186	12	42	10.5	43.7664	32	30	31	3	2	3	3	3	2	1	2	1	1	1	1	1	3	3szermierka	1	1	2	3	1	4	2	2
51	3	1	13	0	1.74	174	55	18.1662	1	13.7333	10.8	27.9773	69	90	0.766667	0.396552	14	41	174	17	25	9.5	38.5316	22	22	22	2	3	3	2	1	2	1	3	1	3	1	1	1	3	0	1	2	5	3	3	2	1	1
52	3	1	13	0	1.7	170	57	19.7232	1	13.4667	9.6	26.2027	69	96	0.71875	0.405882	41	46	168	19	32	10	41.149	34	31	32.5	2	2	3	2	2	2	1	2	1	2	1	1	1	2	0	2	3	2	1	1	1	2	3
53	3	1	13	0	1.67	167	50	17.9282	1	23.3333	10.1333	38.7867	69	98	0.704082	0.413174	44	47	180	21	26	9.5	38.5316	18	16	17	3	2	3	2	2	3	2	2	2	2	2	2	2	2	0	1	3	3	2	1	1	1	2
54	3	1	14	0	1.63	163	47.5	17.878	1	10.6667	8.4	21.3627	66	88	0.75	0.404908	26	54	170	40	41	10.5	42.1312	31	30	30.5	2	2	3	2	2	2	2	1	2	2	1	2	2	2	3jazdakonna	2	4	2	5	1	1	3	3
55	3	1	14	0	1.58	158	43	17.2248	1	15.9333	11.1333	31.0427	63	85	0.741176	0.398734	38	46	162	21	25	9.5	36.7428	32	27	29.5	2	2	3	2	2	2	2	2	3	2	3	2	2	1	0	3	3	1	3	1	1	2	1
56	3	1	13	0	1.62	162	46	17.5278	1	13.1333	8.83333	24.8717	65	82	0.792683	0.401235	32	37	155	25	42	10.5	43.7664	21	20	20.5	2	2	2	1	1	1	1	2	2	3	3	1	1	2	0	3	3	2	3	1	1	3	3
57	3	1	13	1	1.72	172	50	16.901	1	7.46667	8.06667	17.0873	65	87	0.747126	0.377907	9	53	205	29	42	10.5	43.7664	37	33	35	2	3	2	3	2	2	2	2	2	2	2	3	2	3	3komputer	3	5	2	5	2	2	2	3
58	3	1	13	0	1.63	163	39.8	14.9799	0	14.4667	10.5333	28.542	66	90	0.733333	0.404908	34	44	150	24	26	9.5	38.5316	23	21	22	2	2	3	3	2	2	1	2	2	2	2	1	2	3	0	3	3	1	1	0	1	1	2
59	3	1	13	0	1.6	160	55	21.4844	1	19.2667	11.3333	35.318	65	92	0.706522	0.40625	34	56	160	37	38	10	41.149	28	22	25	2	3	3	2	2	3	2	2	1	3	2	1	1	2	3brzuszki	2	5	5	5	1	2	1	3
60	3	1	14	0	1.57	157	42	17.0392	1	9.2	8	19.104	65	85	0.764706	0.414013	31	50	145	30	42	10.5	42.1312	22	22	22	2	1	3	2	2	3	1	1	2	2	1	2	2	2	0	4	3	1	3	1	2	2	2
61	3	1	14	1	1.8	180	57	17.5926	1	18.8	16.1333	40.5613	75	96	0.78125	0.416667	26	51	165	14	32	10	39.437	38	36	37	2	2	3	2	2	2	1	2	1	2	2	1	1	2	3komputer	1	4	2	5	3	1	1	2
62	3	1	14	0	1.685	168.5	58	20.4281	1	15.4	17.4667	38.0607	70	101	0.693069	0.41543	45	59	165	57	26	9.5	36.7428	26	25	25.5	3	2	3	2	2	2	2	2	2	2	2	0	2	2	0	1	3	2	4	1	1	1	1
63	3	1	14	1	1.57	157	50	20.2848	1	20.8667	13.2667	39.5933	68	88	0.772727	0.433121	31	52	168	23	42	10.5	42.1312	30	26	28	2	3	1	1	2	2	1	2	1	2	1	3	1	1	0	2	2	1	1	1	1	1	1
64	3	1	14	1	1.78	178	65	20.5151	1	7.86667	7.13333	16.442	72	95	0.757895	0.404494	22	59	234	50	60	11.5	47.5196	51	48	49.5	2	2	3	2	0	2	2	2	1	2	2	2	1	2	0	2	4	2	1	1	1	1	1
65	3	1	14	1	1.68	168	54	19.1327	1	14.6	15	34.108	76	90	0.844444	0.452381	14	51	175	20	32	10	39.437	30	28	29	2	2	2	2	3	2	2	3	2	2	2	2	2	2	0	3	5	2	1	2	3	4	3
66	3	1	14	1	1.67	167	70	25.0995	2	24.9333	25.6	59.4373	81	102	0.794118	0.48503	26	43	174	16	22	9.5	36.7428	40	33	36.5	2	3	3	2	3	3	2	3	1	2	2	3	2	2	0	1	2	1	3	2	2	1	2
67	3	1	14	1	1.76	176	65	20.984	1	18.8	12.3333	35.9633	72	99	0.727273	0.409091	17	41	210	2	23	9.5	36.7428	34	31	32.5	2	2	3	2	2	2	1	1	2	2	2	2	1	2	3kostkarubika	3	5	3	2	1	1	1	1
68	3	1	13	0	1.67	167	50	17.9282	1	10	5.93333	17.5713	63	91	0.692308	0.377246	42	53	180	46	40	10.5	43.7664	28	26	27	3	2	3	3	0	3	2	2	3	3	2	3	2	3	2jazdakonna	3	4	2	5	2	1	2	3
69	3	1	14	1	1.74	174	62.5	20.6434	1	12.9333	11.2	27.4933	72	98	0.734694	0.413793	1	41	160	16	52	11	44.8254	22	27	24.5	1	2	2	1	2	2	1	2	2	2	2	2	1	1	0	3	3	5	3	1	1	1	1
70	3	1	13	0	1.5	150	39	17.3333	1	12.0667	9.46667	24.3473	63	82	0.768293	0.42	16	52	160	33	60	11.5	49.0012	23	21	22	2	3	3	0	2	2	2	2	2	2	2	2	2	2	2tenisstołowy	1	1	3	2	1	1	1	1
71	3	1	13	0	1.59	159	49.5	19.5799	1	17.8667	12.5333	35.076	66	88	0.75	0.415094	37	55	195	21	52	11	46.3838	32	36	34	3	2	3	3	2	2	2	3	3	1	1	1	1	2	0	3	2	2	1	1	1	1	2
72	3	1	13	0	1.5	150	46	20.4444	1	12.0667	10.7333	25.88	68	91	0.747253	0.453333	38	54	180	21	16	9	35.9142	27	29	28	2	2	2	1	1	2	1	1	1	1	1	1	1	1	0	2	3	1	5	1	1	1	1
73	3	1	14	0	1.72	172	73	24.6755	2	30.3333	16.4667	54.92	77	104	0.740385	0.447674	29	34	143	15	12	8.5	31.3544	33	29	31	2	2	2	1	1	2	1	2	1	2	2	1	1	2	0	5	3	5	5	1	1	1	1
74	1	2	10	1	1.53	153	42.7	18.2408	1	13.2	9	25.154	76	82	0.926829	0.496732	28.5	34	152	30	38	10	46.285	24	23	23.5	2	2	2	2	2	3	3	2	3	2	2	2	1	1	0	1	1	1	1	1	1	1	1
75	1	2	10	1	1.335	133.5	26.3	14.7568	1	5.73333	4.46667	10.634	58	65	0.892308	0.434457	25	48	138	0	23	9.5	43.898	15	18	16.5	3	3	2	3	3	3	3	2	1	2	3	3	2	2	0	3	3	2	2	2	1	2	2
76	1	2	10	0	1.375	137.5	27.7	14.6512	1	9.6	5.8	16.926	57	75	0.76	0.414545	35.5	37	125	0	22	9.5	43.898	16	12	14	3	2	3	2	3	3	3	1	2	1	2	1	2	3	2j.konna	1	2	4	4	2	2	2	3
77	1	2	10	1	1.42	142	47.3	23.4576	2	21.0667	20.6	48.7087	85	89	0.955056	0.598592	28	35	97	0	9	9.5	43.898	21	20	20.5	3	3	3	3	3	3	2	2	2	2	3	3	2	2	0	1	3	3	2	2	1	1	2
78	1	2	10	1	1.355	135.5	31.5	17.1566	1	10	6.46667	18.2167	68.5	74	0.925676	0.505535	29	45	105	25	40	10.5	48.672	20	16	18	2	2	2	2	2	2	2	1	1	1	2	2	1	1	0	2	2	1	1	1	1	1	1
79	1	2	10	1	1.39	139	35	18.115	1	16.8667	7.06667	27.2513	70	76	0.921053	0.503597	29	48	139	8	32	10	46.285	22	22	22	3	3	2	3	3	3	3	2	2	2	2	3	2	3	0	1	1	2	1	1	1	1	2
80	1	2	10	1	1.4	140	36	18.3673	1	13.0667	9.53333	25.638	75	79	0.949367	0.535714	35.5	41	119	15	15	9	41.511	20	20	20	3	3	2	3	3	3	2	2	2	3	2	3	2	2	0	1	1	2	1	2	1	1	1
81	1	2	10	0	1.42	142	39.2	19.4406	1	14.8	8.66667	26.6867	67.5	82	0.823171	0.475352	28.5	30	108	0	10	8.5	39.124	23	22	22.5	3	3	2	2	3	3	3	2	3	2	2	3	3	3	0	1	1	1	1	1	1	1	2
82	1	2	10	1	1.435	143.5	30	14.5686	0	6	5.06667	11.6827	57	71	0.802817	0.397213	25.5	42	157	20	17	9	41.511	21	20	20.5	3	3	2	2	3	3	1	2	1	1	2	3	1	1	0	1	1	2	1	1	1	1	2
83	1	2	10	0	1.38	138	50	26.255	3	27.8667	29	67.1007	83	86	0.965116	0.601449	35	42	104	20	11	8.5	39.124	17	14	15.5	2	2	3	2	3	3	2	3	2	2	3	3	2	3	0	1	2	3	4	2	1	1	2
84	1	2	10	1	1.35	135	24.7	13.5528	0	6.06667	5.2	11.9247	60	67	0.895522	0.444444	22	40	120	40	17	9	41.511	18	14	16	3	2	2	2	3	3	2	2	1	2	2	3	2	2	0	2	1	3	2	3	1	1	2
85	1	2	10	1	1.395	139.5	34.8	17.8826	1	13.6	7.66667	24.0247	69	79	0.873418	0.494624	30	43	123	23	11	8.5	39.124	20	18	19	3	2	3	3	3	3	2	1	2	1	2	3	2	1	0	2	4	2	1	2	1	1	2
86	1	2	10	0	1.31	131	24.3	14.16	0	8	5.06667	14.1027	55	64	0.859375	0.419847	37.5	36	120	8	20	9	41.511	18	14	16	2	2	2	2	3	3	3	2	2	2	2	2	2	3	0	4	2	1	1	2	1	2	1
87	1	2	10	0	1.425	142.5	34.9	17.1868	1	9.33333	7.13333	18.2167	63	75	0.84	0.442105	22.5	44	139	4	8	8.5	39.124	16	16	16	3	3	2	3	3	3	3	3	2	3	2	3	3	3	0	3	3	5	1	1	4	1	1
88	1	2	10	1	1.463	146.3	38.5	17.9876	1	14.8667	7.66667	25.5573	70	79	0.886076	0.478469	15.5	30	108	0	9	8.5	39.124	21	18	19.5	2	2	2	2	2	3	3	1	2	1	1	2	1	1	0	4	4	3	2	2	1	1	1
89	1	2	10	1	1.59	159	47.3	18.7097	1	10.9333	8.06667	21.282	78	84	0.928571	0.490566	25	34	97	0	17	9	41.511	23	21	22	3	3	2	3	3	3	2	2	1	2	2	3	2	2	0	1	2	4	1	1	1	1	2
90	1	2	10	0	1.325	132.5	27.4	15.607	1	8.93333	5.5	15.7563	56	73	0.767123	0.422642	29	36	119	0	19	9	41.511	17	15	16	3	2	3	2	3	3	3	2	3	2	2	2	3	3	0	3	4	2	1	1	1	1	3
91	1	2	10	1	1.31	131	26.4	15.3837	1	8.2	4.93333	14.1833	62	67	0.925373	0.473282	23	40	113	29	13	8.5	39.124	14	16	15	3	3	3	2	3	3	2	2	1	2	2	3	1	3	0	2	3	1	2	1	1	1	2
92	1	2	10	0	1.335	133.5	25.8	14.4763	0	9.4	6.2	17.168	50	71	0.704225	0.374532	38	52	124	0	30	9.5	43.898	13	10	11.5	2	3	2	3	3	2	1	2	3	3	2	2	3	3	0	4	5	1	3	1	2	3	1
93	1	2	10	0	1.37	137	27.2	14.492	0	7.26667	4.2	12.1667	64	69	0.927536	0.467153	26	60	124	3	20	9.5	43.898	18	15	16.5	3	2	3	2	3	2	2	2	3	2	2	2	3	3	0	1	1	1	1	2	1	1	2
94	1	2	10	1	1.43	143	36.8	17.996	1	8.13333	7.86667	17.652	63	77	0.818182	0.440559	33	56	167	25	9	8.5	39.124	22	24	23	3	3	3	3	3	3	1	1	1	2	2	3	2	2	0	4	4	5	5	2	1	1	1
95	1	2	10	1	1.38	138	31.8	16.6982	1	7	5.66667	13.6187	60	71	0.84507	0.434783	31.5	37	115	0	10	8.5	39.124	22	19	20.5	3	3	3	3	3	3	3	3	3	3	3	3	3	3	0	1	1	1	1	5	1	1	1
96	1	2	10	1	1.39	139	30.9	15.993	1	6.8	6.26667	14.1027	62	71	0.873239	0.446043	38	49	155	33	13	8.5	39.124	20	21	20.5	3	2	2	1	2	3	2	2	2	2	2	2	1	2	0	5	4	1	2	1	1	1	1
97	1	2	10	1	1.415	141.5	34.8	17.3807	1	15	9.73333	28.2193	66	77	0.857143	0.466431	17.5	41	131	27	6	8	36.737	22	21	21.5	2	2	3	2	2	3	2	2	2	2	2	3	3	3	0	4	5	3	3	1	1	1	2
98	1	2	10	0	1.42	142	44.8	22.2178	2	12.2	16.5333	33.0593	83	85	0.976471	0.584507	26	41	83	0	9	8.5	39.124	18	18	18	2	2	2	1	3	3	2	2	3	3	2	3	3	3	0	2	3	1	5	2	1	1	5
99	1	2	10	1	1.385	138.5	29.6	15.4309	1	10.0667	6.86667	18.7813	65	75	0.866667	0.469314	28	45	156	29	9	8.5	39.124	18	22	20	3	2	2	1	3	3	2	2	2	2	2	2	2	3	0	2	5	1	1	1	1	1	1
100	1	2	10	1	1.34	134	25.3	14.09	0	7.46667	6.4	15.0707	60	63	0.952381	0.447761	32	58	141	30	34	10	46.285	17	21	19	2	2	2	2	3	3	1	1	2	1	2	2	2	2	0	2	3	1	1	1	1	1	2
101	1	2	10	0	1.39	139	29.3	15.1648	1	11.2	7.73333	21.2013	65	71.5	0.909091	0.467626	27.5	42	110	0	8	8.5	39.124	18	17	17.5	3	2	3	2	3	3	2	2	2	2	2	2	3	3	0	2	2	1	3	1	1	1	2
102	1	2	10	1	1.455	145.5	40.3	19.0361	1	14.6	8.06667	25.7187	67	80	0.8375	0.460481	38	41	128	27	9	8.5	39.124	23	22	22.5	3	3	2	1	1	3	3	3	3	3	3	3	3	3	0	5	1	1	1	1	3	1	1
103	1	2	10	1	1.48	148	31.6	14.4266	0	6.8	4.26667	11.6827	65	72	0.902778	0.439189	28.5	40	129	36	12	8.5	39.124	24	22	23	3	3	3	3	3	3	3	3	3	3	3	3	3	3	0	1	1	1	1	5	1	1	1
104	1	2	10	1	1.33	133	25	14.1331	0	8.86667	5.53333	15.716	44	69	0.637681	0.330827	36.5	49	120	0	10	8.5	39.124	13	15	14	3	3	3	3	2	2	2	2	1	1	2	2	2	2	0	2	2	2	1	1	1	1	1
105	1	2	10	1	1.36	136	27.7	14.9762	1	10.8667	6.46667	19.2653	58	71	0.816901	0.426471	28	50	125	16	28	9.5	43.898	17	16	16.5	3	2	2	2	3	3	3	2	1	2	2	3	2	2	0	2	3	1	1	2	1	1	2
106	1	2	10	0	1.29	129	25.8	15.5039	1	8.86667	5.66667	15.8773	45	70	0.642857	0.348837	25	51	110	43	24	9.5	43.898	12	11	11.5	2	2	2	2	2	2	1	1	2	1	2	1	2	2	0	2	2	2	2	1	1	1	2
107	1	2	10	1	1.34	134	28	15.5937	1	9.53333	7.4	18.7813	65	74	0.878378	0.485075	15	38	104	10	10	8.5	39.124	16	18	17	3	2	2	3	2	2	1	1	2	2	1	2	1	1	0	1	1	1	1	1	1	1	2
108	1	2	10	0	1.37	137	46.4	24.7216	3	20.7333	21.4	49.2733	79	94	0.840426	0.576642	38.5	36	115	35	9	8.5	39.124	18	15	16.5	2	2	3	3	3	3	2	1	1	2	2	1	3	3	0	2	2	2	1	1	1	1	1
109	2	2	12	0	1.38	138	26.5	13.9151	0	5.6	5.4	11.602	59	68	0.867647	0.427536	28.5	31	108	11	18	9	37.7798	13	15	14	3	3	2	3	3	3	3	2	2	2	2	1	2	2	0	4	5	1	1	1	3	1	1
110	2	2	12	0	1.41	141	35	17.6047	1	12.8667	8.86667	24.5893	67	82	0.817073	0.475177	33	37	124	18	12	8.5	35.2392	18	18	18	3	3	2	3	3	3	3	2	2	2	2	3	1	2	0	2	5	1	1	1	1	1	1
111	2	2	12	0	1.705	170.5	50.8	17.4749	1	9.86667	6.66667	18.2973	68	89	0.764045	0.398827	29	36	125	0	20	9	37.7798	22	22	22	2	2	3	3	2	3	3	2	3	3	2	2	2	2	0	1	3	2	1	1	1	2	2
112	2	2	12	1	1.575	157.5	70.3	28.3396	3	27.4	32.4	70.65	97.5	101	0.965347	0.619048	25.5	40	120	20	9	8.5	35.2392	26	28	27	2	3	2	1	2	3	1	2	1	2	2	2	1	1	0	3	4	5	3	1	1	1	3
113	2	2	12	0	1.53	153	60.4	25.802	3	20.7333	19.6	47.0953	85	95.5	0.890052	0.555556	39.5	42	95	0	17	9	37.7798	22	20	21	2	3	3	2	2	3	2	2	3	2	2	2	3	3	3spacerzpsem	1	1	1	2	2	1	1	2
114	2	2	12	1	1.45	145	32.4	15.4102	1	5.93333	5.13333	11.6827	58	66	0.878788	0.4	30	43	160	27	50	11	47.9422	24	22	23	2	3	2	1	1	2	1	2	1	2	1	3	1	1	0	1	1	5	2	1	3	2	2
115	2	2	12	1	1.57	157	38.8	15.741	1	10.6667	7.06667	19.7493	69.5	82	0.847561	0.442675	21	44	175	26	40	10.5	45.4016	29	28	28.5	2	2	3	2	3	3	1	3	3	3	1	3	2	3	0	2	1	1	2	1	1	1	1
116	2	2	12	0	1.63	163	45.2	17.0123	1	11.9333	8.26667	22.734	73.5	85	0.864706	0.45092	30	42	144	26	27	9.5	40.3204	27	26	26.5	2	3	2	2	3	3	2	2	3	3	2	2	3	3	0	3	2	5	4	3	3	1	5
117	2	2	12	1	1.44	144	47.2	22.7623	2	16.1333	28.6667	52.5	84	89.5	0.938547	0.583333	19	37	147	13	18	9	37.7798	19	21	20	2	3	3	3	3	3	3	3	2	2	2	3	2	2	3tenissto³owy	3	4	1	1	4	1	1	2
118	2	2	12	1	1.465	146.5	37.3	17.3794	1	14.8667	9.53333	27.816	67	82.5	0.812121	0.457338	27	39	150	27	25	9.5	40.3204	24	24	24	2	3	2	3	3	3	1	2	2	2	2	3	2	1	0	2	1	1	2	3	1	3	4
119	2	2	12	1	1.645	164.5	48.5	17.923	1	8.4	7.2	17.168	66.5	88.5	0.751412	0.404255	44	55	162	43	48	10.5	45.4016	34	30	32	2	3	2	2	3	3	2	2	1	2	2	3	2	1	0	3	1	3	1	1	1	1	1
120	2	2	12	1	1.59	159	38.2	15.1102	0	5.8	5.4	11.844	64	80	0.8	0.402516	43.5	58	208	0	50	11	47.9422	30	30	30	3	3	2	2	3	2	2	2	1	1	1	2	2	1	0	2	2	2	3	1	1	1	2
121	2	2	12	0	1.43	143	28.9	14.1327	0	11.5333	4.86667	18.136	56	72	0.777778	0.391608	20.5	35	124	0	26	9.5	40.3204	18	16	17	2	3	3	2	3	3	2	2	2	3	2	2	2	2	0	2	2	3	1	1	2	1	4
122	2	2	12	0	1.365	136.5	33.6	18.0332	1	13.1333	6.46667	22.008	64	77	0.831169	0.468864	41	45	144	0	50	11	47.9422	19	19	19	3	2	3	2	2	2	1	2	3	3	2	3	2	2	3zabawazrówiesnikami,3-spacerzpsem	1	1	2	2	4	5	1	5
123	3	2	14	1	1.78	178	73.2	23.1031	2	16.7333	14.6	36.2053	88	100	0.88	0.494382	17.5	38	175	17	38	10	39.437	41	40	40.5	2	2	2	1	2	2	2	2	2	2	2	2	1	1	0	3	3	1	1	1	1	1	1
124	3	2	14	0	1.61	161	49.7	19.1736	1	12.4	11.8	27.574	66	93	0.709677	0.409938	32.5	37	130	0	18	9	34.0486	32	29	30.5	2	2	2	2	2	2	2	2	1	3	2	2	2	3	0	4	4	5	5	1	1	1	3
125	3	2	14	1	1.74	174	61.9	20.4452	1	8.4	7.73333	17.8133	78	94	0.829787	0.448276	27	36	189	18	36	10	39.437	40	40	40	3	3	2	2	3	3	2	2	2	1	2	3	2	2	0	5	5	1	3	1	1	1	1
126	3	2	14	0	1.67	167	51.9	18.6095	1	11.2667	8.73333	22.492	65	89	0.730337	0.389222	28	31	125	0	15	9	34.0486	18	16	17	2	2	3	2	2	3	1	2	1	2	2	1	2	3	0	4	4	3	2	1	1	1	2
127	3	2	14	0	1.574	157.4	37.7	15.2171	0	9	7.4	18.136	63.5	77	0.824675	0.403431	31	42	179	0	27	9.5	36.7428	23	25	24	2	3	2	2	3	3	2	2	2	2	1	2	3	2	0	2	1	1	3	1	1	1	2
128	3	2	14	0	1.55	155	45.5	18.9386	1	14.7333	8.6	26.5253	63	89.5	0.703911	0.406452	30	36	132	0	15	9	34.0486	21	22	21.5	2	1	3	1	2	1	1	2	1	2	1	1	1	3	0	2	3	1	2	2	1	1	1
129	3	2	14	1	1.64	164	59.5	22.1222	1	7.93333	8.53333	18.2167	77.5	92	0.842391	0.472561	22.5	20	200	13	68	12	50.2138	42	40	41	2	3	3	2	3	3	3	2	1	2	2	3	1	1	0	3	2	1	1	1	1	1	1
130	3	2	14	1	1.65	165	69.5	25.528	2	23.4	23.5333	55.0813	92.5	100	0.925	0.560606	20	33	140	0	18	9	34.0486	38	35	36.5	3	3	3	2	3	3	3	2	2	3	2	3	2	2	3skakanie	5	5	2	4	1	1	2	1
131	3	2	14	1	1.66	166	56.6	20.54	1	9.2	8.53333	19.7493	73	90	0.811111	0.439759	19.5	47	190	35	26	9.5	36.7428	55	51	53	3	3	3	2	3	3	2	2	2	3	3	3	2	2	0	2	3	1	3	2	3	1	2
132	3	2	14	1	1.68	168	78.7	27.8841	3	24.1333	31.9333	66.1327	101	102	0.990196	0.60119	29	34	165	5	26	9.5	36.7428	31	31	31	3	3	2	2	3	3	1	2	1	2	2	3	1	1	2granakomputerze	4	3	2	2	3	2	1	1
133	3	2	14	1	1.58	158	41.7	16.7041	1	10.6	7.13333	19.7493	69	80	0.8625	0.436709	25.5	22	153	41	50	11	44.8254	21	20	20.5	3	3	2	1	3	3	2	2	3	2	2	3	1	2	3wêdkarstwo3wspinaczka	5	2	3	3	2	2	2	3
134	3	2	14	1	1.635	163.5	51	19.0781	1	6.6	6.7	14.385	70	84	0.833333	0.428135	36	49	170	25	66	11.5	47.5196	29	27	28	2	3	2	2	2	2	2	2	1	2	3	3	1	1	0	3	3	2	1	1	1	3	1
135	3	2	14	1	1.59	159	54.3	21.4786	1	13.9333	10.6	27.9773	77	93	0.827957	0.484277	21	28	146	41	33	10	39.437	27	30	28.5	3	2	3	3	3	3	2	2	2	2	2	2	2	1	0	3	4	1	2	1	1	1	1
136	3	2	14	1	1.595	159.5	52	20.4401	1	9.26667	8.46667	19.7493	79	86	0.918605	0.495298	20	51	175	22	63	11.5	47.5196	37	32	34.5	2	2	1	2	3	2	1	2	1	2	3	3	1	1	0	4	3	1	1	1	1	1	1
137	3	2	14	1	1.73	173	71.6	23.9233	2	17	26	50.322	95	96	0.989583	0.549133	22	27	147	0	26	9.5	36.7428	39	38	38.5	2	2	2	1	3	2	1	2	1	1	2	2	1	1	0	4	1	1	1	2	1	2	1
138	3	2	14	1	1.71	171	69.5	23.768	2	12.5333	12.2	28.2193	88	100	0.88	0.51462	31.5	47	157	16	45	10.5	42.1312	50	45	47.5	3	3	3	2	3	3	2	2	2	2	2	2	2	2	0	1	4	1	3	2	1	1	1
139	2	2	11	1	1.52	152	31	13.4176	0	7.4	4.93333	13.2153	58	72	0.805556	0.381579	11	37	135	17	32	10	44.573	21	18	19.5	3	3	3	3	3	1	1	3	1	3	3	3	3	2	0	4	3	2	1	4	5	3	2
140	1	2	10	0	1.45	145	51.8	24.6373	3	21.9333	21.2	50.4833	83	88	0.943182	0.572414	24	35	118	0	12	8.5	39.124	20	12	16	2	2	2	2	3	2	1	1	2	2	3	1	2	3	0	3	2	4	1	3	1	2	2
141	1	2	10	1	1.54	154	66.3	27.9558	3	24.3333	25.7333	58.8727	86.5	100	0.865	0.561688	39	34	105	0	6	8	36.737	21	15	18	2	2	2	1	3	2	3	1	1	2	2	2	1	1	0	2	2	2	1	1	1	1	1
142	2	2	11	1	1.52	152	41	17.7458	1	16.2	9.73333	29.6713	70	82	0.853659	0.460526	19	33	133	15	22	9	39.6454	20	20	20	2	3	3	3	3	3	2	2	1	2	2	2	1	1	0	3	4	1	2	1	1	1	2
143	1	2	10	1	1.32	132	25.8	14.8072	1	7.26667	5.13333	13.296	55	65.5	0.839695	0.416667	18	42	155	0	54	11	51.059	18	15	16.5	1	2	1	1	1	1	1	2	2	1	1	3	1	2	0	2	5	2	2	2	1	2	1
144	1	2	10	0	1.525	152.5	58.5	25.1545	3	15.9333	20.6667	42.578	81.5	96.5	0.84456	0.534426	27	34	130	0	12	8.5	39.124	19	12	15.5	2	2	3	2	3	3	1	1	2	2	2	2	3	2	0	3	4	1	1	1	2	1	4
145	2	2	12	1	1.6	160	47.9	18.7109	1	15.0667	7.93333	26.122	71	87	0.816092	0.44375	32	52	160	14	56	11	47.9422	30	24	27	3	3	2	2	3	3	2	2	1	2	2	3	1	1	0	2	2	2	1	2	1	2	1
146	2	2	12	1	1.62	162	56.1	21.3763	2	17.6667	19.1333	42.82	80	89	0.898876	0.493827	24	33	150	7	18	9	37.7798	24	22	23	2	3	2	2	3	3	1	2	1	2	1	3	2	1	0	3	3	2	2	2	1	1	1
147	2	2	12	1	1.45	145	31.5	14.9822	0	7.06667	5.06667	12.9733	61	72	0.847222	0.42069	34	49	160	31	18	9	37.7798	20	16	18	3	2	3	2	2	3	2	2	2	2	2	2	2	2	0	2	3	1	2	3	1	1	2
148	2	2	12	1	1.53	153	43.5	18.5826	1	12.7333	10.1333	25.9607	69	81	0.851852	0.45098	29	44	161	14	56	11	47.9422	21	22	21.5	3	3	2	2	3	3	2	2	1	2	2	3	1	1	0	3	3	2	2	2	1	2	1
149	2	2	12	1	1.465	146.5	31.3	14.5837	0	7.66667	5.06667	13.6993	60	70	0.857143	0.409556	33	49	162	20	60	11.5	50.4828	25	18	21.5	3	3	2	2	3	3	2	2	2	2	2	3	1	1	0	3	3	1	3	2	1	2	2
150	2	2	12	0	1.59	159	43.6	17.2462	1	12.6	7.93333	23.1373	62	82	0.756098	0.389937	32	34	115	0	32	10	42.861	26	26	26	2	2	2	2	3	3	1	2	2	2	2	1	2	1	0	1	2	1	1	1	1	1	2
151	2	2	12	0	1.53	153	39.9	17.0447	1	9.73333	9.46667	21.524	61	77	0.792208	0.398693	44	57	170	33	60	11	47.9422	30	26	28	2	3	2	1	3	2	2	2	1	2	2	1	2	1	0	3	2	4	4	1	2	2	2
152	2	2	12	1	1.57	157	45.9	18.6214	1	11.9333	7.4	21.6853	70.5	85.5	0.824561	0.449045	32	53	195	41	84	12.5	55.564	30	29	29.5	2	3	2	3	3	2	2	2	2	2	2	3	2	1	0	3	3	2	3	1	1	1	2
153	2	2	12	1	1.695	169.5	60.9	21.1972	1	16.3333	12.2	32.8173	81	90	0.9	0.477876	23.5	37	140	0	43	10.5	45.4016	32	32	32	2	3	2	1	3	3	2	3	2	2	2	3	2	1	0	3	4	2	4	3	3	1	2
154	2	2	12	1	1.65	165	50.7	18.6226	1	14.7333	16.4	35.9633	85	91	0.934066	0.515152	10.5	36	142	0	20	9	37.7798	37	30	33.5	2	2	2	2	3	3	2	2	2	2	2	2	1	1	3zabawazpsem	2	1	1	1	2	1	1	1
155	2	2	12	0	1.47	147	45	20.8247	1	17.4667	13.9333	36.286	72	85	0.847059	0.489796	25	54	145	41	30	9.5	40.3204	19	20	19.5	2	3	2	2	3	3	2	2	2	3	2	2	2	3	0	3	2	3	5	2	1	1	1
156	1	1	10	1	1.47	147	51.6	23.8789	2	16.0667	19.4667	41.2873	89	82	1.08537	0.605442	27	45	114	0	18	9	41.511	26	23	24.5	2	2	3	2	2	3	2	2	1	2	2	2	1	1	0	1	1	2	2	1	1	1	1
157	1	1	10	1	1.47	147	33.4	15.4565	1	7.13333	5.26667	13.296	71.5	65	1.1	0.486395	33.5	52	163	29	40	10.5	48.672	23	22	22.5	3	2	2	2	2	2	2	2	1	1	2	3	1	1	0	1	1	2	3	1	1	1	2
158	1	1	10	1	1.39	139	29.5	15.2684	1	10.8	6.06667	18.7007	69.5	58.5	1.18803	0.5	28.5	57	129	17	3	8	36.737	19	18	18.5	2	3	2	2	2	3	2	1	1	2	2	3	2	1	2tenissto³owy	1	1	2	3	2	1	1	2
159	1	1	10	0	1.37	137	31	16.5166	1	10.0667	6.86667	18.7813	61.5	74.5	0.825503	0.448905	33	56	122	0	20	9	41.511	17	14	15.5	2	2	2	2	3	3	2	2	2	1	3	1	2	2	0	3	1	2	3	1	1	1	2
160	1	1	10	0	1.33	133	27.7	15.6594	1	7.2	5.8	14.022	56.5	69	0.818841	0.424812	32	59	121	0	15	9	41.511	19	16	17.5	3	3	3	2	2	2	2	1	2	1	3	2	3	2	3zabawazpsem	2	4	5	2	1	1	2	4
161	1	1	10	0	1.43	143	36.9	18.0449	1	14.8	10.4667	28.8647	68	79.5	0.855346	0.475524	28.5	40	117	0	21	9	41.511	22	24	23	3	3	3	1	2	3	3	2	2	2	2	3	2	3	0	2	1	2	2	1	1	3	1
162	1	1	10	0	1.33	133	29.5	16.677	1	9.4	4.8	15.474	58	73.5	0.789116	0.43609	34	58	116	25	26	9.5	43.898	18	18	18	2	1	2	2	2	2	2	1	2	1	2	1	2	1	0	2	2	3	2	1	2	1	2
163	1	1	10	0	1.43	143	41.4	20.2455	2	17.7333	17.6667	41.126	68	84.5	0.804734	0.475524	27.5	48	136	14	18	9	41.511	19	20	19.5	1	2	2	1	2	2	2	1	2	1	1	1	2	3	0	1	1	1	1	1	1	1	3
164	1	1	10	0	1.375	137.5	30.4	16.0793	1	13.6	8.13333	24.5893	59	72	0.819444	0.429091	30	46	113	25	20	9	41.511	16	17	16.5	2	2	3	2	3	3	2	1	2	1	3	2	3	1	0	1	2	3	3	2	1	1	1
165	1	1	10	0	1.46	146	49	22.9874	2	20.5333	15.8667	42.336	75	89.5	0.837989	0.513699	32.5	55	146	32	15	9	41.511	24	27	25.5	2	3	2	2	3	3	3	1	2	2	2	2	1	1	2hulajnoga	2	2	2	2	1	1	1	2
166	1	1	10	0	1.42	142	37.2	18.4487	1	12.6	10.8667	26.6867	64	74	0.864865	0.450704	23	24	102	0	12	8.5	39.124	22	20	21	2	2	2	2	2	2	2	2	1	2	2	2	2	2	0	2	3	3	2	3	3	2	1
167	1	1	10	0	1.45	145	30.1	14.3163	0	9	6.46667	17.0067	57.5	73.5	0.782313	0.396552	34	30	130	11	22	9	41.511	16	13	14.5	3	3	2	2	3	3	3	2	3	2	3	2	2	2	0	2	4	1	1	1	2	2	1
168	1	1	10	1	1.31	131	27.9	16.2578	1	6.13333	5.2	12.0053	67	60	1.11667	0.51145	26	52	141	26	56	11	51.059	14	15	14.5	3	3	2	3	2	2	3	2	3	2	3	2	3	2	0	1	2	1	2	3	1	1	2
169	1	1	10	1	1.4	140	38.8	19.7959	1	14.2667	9.53333	27.09	71	80	0.8875	0.507143	33	49	143	17	12	8.5	39.124	18	17	17.5	1	2	2	2	2	2	3	1	2	1	2	1	1	1	0	3	3	2	4	2	2	2	5
170	1	1	10	1	1.44	144	40.4	19.483	1	12.5333	11.2	27.0093	73	78	0.935897	0.506944	31	33	135	0	22	9	41.511	23	21	22	1	3	3	1	1	3	1	1	1	1	2	2	1	1	2rzucanka	2	3	1	1	1	2	2	1
171	1	1	10	1	1.35	135	31.4	17.2291	1	7.93333	6.33333	15.5547	61	73	0.835616	0.451852	36.5	58	108	34	30	9.5	43.898	24	22	23	2	2	2	2	2	2	2	2	1	1	2	1	2	1	0	1	1	1	2	2	1	3	2
172	1	1	10	1	1.4	140	38.8	19.7959	1	13.8	14	31.93	69	82	0.841463	0.492857	27.5	58	130	29	30	9.5	43.898	20	16	18	2	2	2	2	2	3	3	2	2	2	2	3	1	1	0	1	1	2	1	1	1	1	1
173	1	1	10	1	1.4	140	33.2	16.9388	1	10.9333	6.33333	19.1847	64	74	0.864865	0.457143	27	39	135	26	22	9	41.511	18	18	18	2	3	3	3	3	3	2	2	2	1	2	3	2	2	0	2	1	2	2	2	1	1	1
174	1	1	10	1	1.415	141.5	32.3	16.1321	1	8.53333	5.6	15.3933	62	72	0.861111	0.438163	3	38	150	22	30	9.5	43.898	23	22	22.5	3	3	3	3	3	3	3	3	3	3	3	3	3	3	0	2	1	1	1	1	1	1	1
175	1	1	10	0	1.43	143	39.5	19.3163	1	12.4	9.13333	24.3473	63	79.5	0.792453	0.440559	38.5	52	160	19	43	10.5	48.672	23	23	23	3	3	3	3	2	3	3	2	3	3	2	3	2	2	3jedziectwo	2	2	1	1	1	1	1	3
176	1	1	10	0	1.37	137	29.5	15.7174	1	9.33333	8.13333	19.4267	64	70.5	0.907801	0.467153	32	39	140	24	37	10	46.285	20	20	20	2	2	3	3	1	3	3	2	2	2	2	3	1	2	2j.konna	1	3	2	1	1	1	1	4
177	1	1	10	1	1.29	129	32.5	19.5301	1	15.8	10.8667	30.5587	70	76	0.921053	0.542636	31	50	125	20	20	9	41.511	19	17	18	2	3	1	2	1	2	3	3	3	3	2	2	2	1	0	1	5	2	3	1	2	1	1
178	1	1	10	1	1.495	149.5	41.3	18.4785	1	11.2	8	21.524	70	81	0.864198	0.468227	31.5	42	142	17	22	9	41.511	32	29	30.5	2	2	2	1	2	2	2	1	2	2	2	1	1	1	2¿eglarstwo	1	1	1	1	1	1	1	1
179	1	1	10	1	1.33	133	34	19.221	1	11.6667	10.9333	25.638	65.5	76	0.861842	0.492481	37	48	149	25	12	8.5	39.124	20	20	20	1	1	3	3	1	1	2	2	1	2	1	1	1	1	0	3	1	1	5	2	1	1	2
180	1	1	10	1	1.43	143	32.7	15.991	1	7.93333	8	17.5713	60	74	0.810811	0.41958	35	38	159	5	34	10	46.285	19	20	19.5	3	3	1	2	3	3	3	2	1	2	2	2	2	1	0	1	1	5	2	1	1	1	4
181	1	1	10	0	1.34	134	29.1	16.2063	1	11.6667	6.53333	20.314	58	73	0.794521	0.432836	38	49	147	31	36	10	46.285	19	18	18.5	3	2	3	2	2	3	3	1	2	2	2	2	2	1	2jazdakonna	3	1	1	1	2	1	1	1
182	1	1	10	0	1.385	138.5	31.1	16.2129	1	15.2333	11.3333	30.4377	63	72.5	0.868966	0.454874	31	41	102	0	28	9.5	43.898	19	18	18.5	3	3	3	3	3	3	3	3	3	3	3	3	3	3	0	1	1	5	1	1	1	1	3
183	2	1	12	0	1.535	153.5	48.9	20.7535	1	11.5333	9.66667	23.944	88	69	1.27536	0.57329	36	52	178	17	32	10	42.861	28	22	25	2	2	3	2	2	3	2	2	2	2	2	1	1	1	0	3	2	2	3	1	1	1	1
184	2	1	12	0	1.64	164	53.1	19.7427	1	14.1333	7.93333	24.9927	70.5	89.5	0.787709	0.429878	26	49	168	0	52	11	47.9422	28	28	28	3	3	3	2	3	3	3	2	3	1	2	3	2	2	0	1	1	2	4	1	1	3	5
185	2	1	12	0	1.585	158.5	41	16.3202	1	9.26667	7.46667	18.5393	67	81	0.82716	0.422713	29.5	58	173	17	43	10.5	45.4016	26	26	26	2	3	3	2	3	3	2	2	3	2	2	2	2	2	2jazdakonna	3	3	4	4	2	1	1	2
186	2	1	12	0	1.67	167	54	19.3625	1	15	14.3333	33.7853	75	90.5	0.828729	0.449102	25	43	155	0	24	9.5	40.3204	30	26	28	2	2	3	1	3	3	2	1	2	2	1	1	2	2	2jazdakonna	2	2	5	2	2	2	2	2
187	2	1	12	0	1.5	150	38.2	16.9778	1	13.2667	13.7333	30.962	67	80	0.8375	0.446667	29.5	36	160	0	8	8.5	35.2392	18	16	17	2	3	3	2	2	3	2	1	2	2	2	1	2	2	0	1	1	4	3	1	1	1	2
188	2	1	12	0	1.46	146	36	16.8887	1	8.8	7.8	18.378	60.5	76	0.796053	0.414384	42	56	152	31	56	11	47.9422	23	20	21.5	3	2	3	3	2	3	3	2	2	2	2	2	2	2	3gimnastyka	2	1	2	2	1	1	1	3
189	2	1	12	0	1.485	148.5	35.4	16.0528	1	12.7333	6.06667	21.04	59.5	74.5	0.798658	0.400673	35	56	178	25	41	10.5	45.4016	22	21	21.5	2	3	3	3	3	3	3	2	3	2	2	1	2	2	0	3	2	3	1	1	1	1	3
190	2	1	12	0	1.645	164.5	52.7	19.4751	1	15	6.93333	24.8313	69	90	0.766667	0.419453	36	52	185	0	51	11	47.9422	27	23	25	3	3	3	3	2	3	2	3	3	3	3	2	2	2	0	1	1	1	4	1	1	1	1
191	2	1	12	1	1.64	164	59.5	22.1222	2	12.5333	7.46667	22.492	68	93	0.731183	0.414634	24	36	150	28	44	10.5	45.4016	31	29	30	2	3	2	3	3	3	1	3	2	2	3	3	1	1	3tenissto³owy	1	1	2	5	1	1	1	1
192	3	1	13	1	1.54	154	58	24.4561	2	23.0667	19	49.1927	87	91	0.956044	0.564935	18	34	124	0	8	8.5	33.2968	26	20	23	2	2	1	2	2	2	2	2	1	2	2	2	2	1	0	2	2	1	1	1	1	1	1
193	2	1	12	1	1.59	159	54.6	21.5972	2	17.4	16.0667	38.7867	77	87	0.885057	0.484277	21	45	147	7	17	9	37.7798	26	23	24.5	3	2	3	3	3	2	2	2	2	2	2	2	1	2	0	3	5	4	5	1	1	3	2
194	2	1	12	1	1.44	144	41	19.7724	1	15.2667	9.86667	28.7033	66	81	0.814815	0.458333	22.5	44	132	0	11	8.5	35.2392	22	18	20	2	3	3	2	3	3	3	1	2	1	2	1	1	1	0	2	3	2	1	1	1	1	2
195	2	1	12	1	1.61	161	56.6	21.8356	2	15.9333	11.7333	31.7687	89	92	0.967391	0.552795	23	20	159	0	16	9	37.7798	27	25	26	2	3	3	2	2	3	2	2	3	2	2	2	1	2	2skateboard	5	5	4	3	1	1	1	2
196	2	1	12	1	1.55	155	47.9	19.9376	1	8.33333	6.86667	16.684	69.5	84	0.827381	0.448387	19	52	181	32	23	9.5	40.3204	28	25	26.5	2	2	2	2	3	3	2	2	2	2	2	2	1	1	2paintball	4	3	5	2	1	1	2	4
197	2	1	12	1	1.48	148	38.1	17.3941	1	10.3333	6.33333	18.4587	68	79	0.860759	0.459459	33	56	154	18	52	11	47.9422	19	19	19	3	3	3	3	3	3	3	3	3	3	3	3	2	2	3pi³karêczna	1	1	2	2	1	3	1	2
198	2	1	12	1	1.72	172	80	27.0416	3	17.8	17.8	41.368	103	106	0.971698	0.598837	29	42	169	0	18	9	37.7798	36	32	34	2	3	2	2	2	2	2	1	1	3	2	3	1	1	0	3	5	1	1	2	1	1	2
199	2	1	12	1	1.47	147	35.6	16.4746	1	8.86667	5.7	15.9177	58	77	0.753247	0.394558	29	66	181	50	32	10	42.861	32	24	28	3	2	3	2	2	3	3	2	2	2	2	3	2	1	0	3	4	1	4	1	1	1	1
200	2	1	12	1	1.53	153	42.2	18.0273	1	6	6.13333	12.9733	66	80.5	0.819876	0.431373	38	65	167	50	62	11.5	50.4828	25	22	23.5	3	3	2	2	3	2	1	2	1	2	2	3	2	3		2	4	2	5	1	1	1	2
201	2	1	12	0	1.425	142.5	50.9	25.0662	2	12.8	13.6667	30.3167	69	90	0.766667	0.484211	37	47	158	0	24	9.5	40.3204	24	22	23	2	2	3	3	2	2	2	2	2	2	2	2	2	2	2zabawawberka	3	3	5	3	2	2	1	5
202	2	1	12	0	1.38	138	43	22.5793	2	8.26667	7.2	17.0067	62	81	0.765432	0.449275	26.5	45	108	0	12	8.5	35.2392	25	25	25	2	2	2	1	2	2	1	1	1	1	1	1	1	1	0	2	2	4	1	1	1	1	1
203	2	1	12	0	1.56	156	45.1	18.5322	1	9	8.33333	19.2653	65	83	0.783133	0.416667	23	49	137	0	32	10	42.861	30	26	28	2	2	3	1	2	2	1	2	2	2	2	1	1	1	0	2	2	3	1	1	1	1	1
204	2	1	12	0	1.485	148.5	47.2	21.4037	1	17	11.6667	32.9787	70	84	0.833333	0.47138	18	27	120	5	20	9	37.7798	18	18	18	2	3	3	1	2	3	1	2	3	2	2	3	1	1	0	1	3	1	3	4	1	1	2
205	2	1	12	1	1.585	158.5	41.2	16.3998	1	7.46667	6.36667	15.0303	62	80	0.775	0.391167	17	43	131	15	21	9	37.7798	20	20	20	1	2	2	1	2	1	1	1	1	1	1	2	1	1	0	1	5	1	2	1	1	1	1
206	2	1	12	0	1.64	164	54.7	20.3376	1	13.2667	10.5333	27.09	65.5	91	0.71978	0.39939	45	47	157	0	33	10	42.861	35	31	33	1	3	3	1	2	1	3	3	3	1	1	1	1	1	0	3	1	1	1	2	1	1	2
207	2	1	12	1	1.37	137	36.9	19.6601	1	14.0667	10.9333	28.542	67	80	0.8375	0.489051	22.5	59	125	10	24	9.5	40.3204	16	16	16	3	2	3	3	1	2	1	1	1	1	1	2	1	1	0	3	4	0	2	1	1	1	2
208	2	1	12	1	1.46	146	34.8	16.3258	1	7.8	6	14.99	57	74	0.77027	0.390411	31	56	183	38	55	11	47.9422	20	20	20	3	3	2	2	1	2	3	1	2	3	2	2	3	1	2	1	2	1	1	1	1	1	1
209	2	1	11	0	1.62	162	49.7	18.9377	1	14.4	12	30.236	64	88	0.727273	0.395062	35.5	41	155	0	19	9	39.6454	33	28	30.5	2	2	3	1	2	3	2	2	2	3	2	2	2	2	0	1	3	3	3	1	1	1	1
210	2	1	12	0	1.59	159	48.5	19.1844	1	11.8667	11.6	26.6867	79	87	0.908046	0.496855	27	39	150	0	24	9.5	40.3204	26	24	25	2	3	2	1	3	3	3	2	3	2	2	2	2	2	0	4	4	5	2	3	1	1	2
211	2	1	12	0	1.41	141	34.5	17.3533	1	8.26667	9.06667	19.2653	66.5	77	0.863636	0.471631	20	43	112	0	12	8.5	35.2392	20	16	18	2	1	3	2	2	3	2	1	2	2	2	1	1	1	0	2	1	3	2	1	1	1	3
212	3	2	14	0	1.655	165.5	49.8	18.1817	1	12.0667	10.2667	25.3153	69	87	0.793103	0.416918	30.5	48	178	0	23	9.5	36.7428	39	34	36.5	3	2	2	2	3	2	2	2	2	2	1	2	2	2	0	2	1	0	4	3	0	4	2
213	3	2	14	1	1.7	170	81.4	28.1661	3	19.3333	22.1333	48.4667	92	107	0.859813	0.541176	18.5	49	123	25	29	9.5	36.7428	31	33	32	2	3	2	1	3	3	2	1	1	2	2	3	1	2	0	4	5	2	1	4	2	3	2
214	3	2	14	0	1.63	163	51.6	19.4211	1	12.6	8.8	24.186	73	88	0.829545	0.447853	26	49	203	0	47	10.5	42.1312	30	28	29	3	2	3	2	3	3	2	2	3	3	2	3	3	3	0	2	1	2	1	1	1	0	1
215	3	2	14	0	1.64	164	65.7	24.4274	2	23.5333	18.4	49.0313	88	100	0.88	0.536585	38	29	152	0	37	10	39.437	30	27	28.5	2	2	3	2	2	2	2	2	2	2	2	2	2	3	0	3	4	3	2	1	1	1	5
216	3	2	14	0	1.575	157.5	46.2	18.6243	1	12.2667	9.8	24.9927	67	87	0.770115	0.425397	22.5	26	155	0	22	9	34.0486	23	23	23	2	2	2	2	2	3	2	2	2	2	2	2	2	2	0	5	5	2	5	1	1	2	4
217	3	2	13	1	1.67	167	66	23.6652	2	18.2	25.8	51.532	88	96	0.916667	0.526946	14	36	154	0	26	9.5	38.5316	32	30	31	2	2	3	2	3	3	2	2	2	2	2	2	2	2	0	3	3	2	4	1	1	1	1
218	3	2	14	0	1.61	161	46.1	17.7848	1	13.8	10.2667	27.4127	67	87	0.770115	0.416149	25	30	146	0	23	9.5	36.7428	27	22	24.5	2	3	3	2	3	2	1	2	2	3	2	2	2	2	0	1	5	1	4	1	2	1	2
219	3	2	14	1	1.5	150	42.8	19.0222	1	10.2	6.2	18.136	68	77	0.883117	0.453333	23.5	54	138	40	50	11	44.8254	21	20	20.5	2	2	2	2	2	2	1	2	1	2	1	3	2	1		4	1	1	2	1	1	1	1
220	3	2	14	0	1.59	159	47	18.591	1	9.06667	6.93333	17.652	67	88	0.761364	0.421384	25.5	49	194	0	59	11.5	47.5196	31	29	30	2	3	3	2	3	2	2	3	2	2	2	2	2	2		4	2	1	3	1	1	2	5
221	3	2	14	1	1.77	177	56.9	18.1621	1	7	6.06667	14.1027	71	91	0.78022	0.40113	44	52	195	0	77	12	50.2138	39	30	34.5	2	3	3	1	2	2	2	2	2	2	2	2	2	1		4	5	1	2	1	1	1	1
222	3	2	14	0	1.7	170	66.2	22.9066	1	23.9333	17.8667	48.87	80	101	0.792079	0.470588	28	23	132	0	23	9.5	36.7428	22	30	26	2	3	3	2	2	3	1	2	2	3	2	2	2	2		1	5	1	3	2	2	1	2
223	3	2	14	1	1.62	162	47.2	17.9851	1	14.2667	8.06667	25.3153	71.5	86	0.831395	0.441358	24.5	53	157	0	26	9.5	36.7428	22	20	21	1	2	3	1	2	2	1	1	1	1	1	2	1	1	0	3	1	2	2	1	1	1	1
224	3	2	14	1	1.61	161	48.5	18.7107	1	8.86667	7	17.4907	70	84.5	0.828402	0.434783	32	66	210	71	98	13	55.6022	39	38	38.5	2	3	2	2	2	2	1	1	1	1	2	3	1	1	0	2	5	1	2	1	1	1	2
225	3	2	14	1	1.63	163	43.7	16.4477	1	6.73333	5.4	12.9733	65	81	0.802469	0.398773	22	53	154	24	76	12	50.2138	30	23	26.5	3	3	1	1	3	2	1	2	1	2	2	3	2	1	0	4	3	1	1	1	1	1	2
226	3	2	14	1	1.595	159.5	45.1	17.7278	1	12.9333	7.6	23.1373	72	83.5	0.862275	0.451411	22.5	47	148	0	61	11.5	47.5196	28	20	24	2	3	2	2	2	2	3	3	2	2	2	3	2	1	0	3	4	1	2	1	1	1	1
227	3	2	14	1	1.62	162	37.3	14.2128	0	6.06667	5.46667	12.2473	63	76	0.828947	0.388889	13.5	52	176	39	54	11	44.8254	29	29	29	3	3	3	2	3	3	2	2	2	2	2	3	1	1	0	2	3	2	4	3	1	1	2
228	3	2	14	0	1.56	156	53.3	21.9017	1	19.6	11	35.318	79	91	0.868132	0.50641	35.5	41	123	0	22	9	34.0486	26	24	25	3	2	3	2	2	3	3	2	1	2	2	2	2	2	3komputer	5	5	1	3	1	1	1	2
229	3	2	14	0	1.66	166	71.4	25.9109	2	22.7333	20.4	50.4833	93	104	0.894231	0.560241	25	24	157	0	24	9.5	36.7428	32	34	33	1	1	1	1	3	2	1	2	1	3	1	1	1	1	0	4	5	1	3	1	2	2	1
230	3	2	14	0	1.595	159.5	43.7	17.1775	1	10.5333	7.53333	20.1527	68	85	0.8	0.426332	35	45	170	0	66	11.5	47.5196	30	28	29	2	3	3	2	2	3	2	2	2	2	2	3	2	2	0	2	1	2	1	2	1	2	3
231	3	2	14	1	1.77	177	60.1	19.1835	1	7.06667	6.66667	14.9093	73	90	0.811111	0.412429	16.5	50	195	21	83	12.5	52.908	50	49	49.5	2	3	1	1	3	3	2	2	2	2	2	3	2	1	0	3	3	1	1	1	1	1	2
232	3	2	14	1	1.61	161	42.1	16.2417	0	6.4	6.53333	13.9413	63	83	0.759036	0.391304	35	56	198	78	67	11.5	47.5196	30	21	25.5	2	3	3	2	3	3	1	2	1	2	2	3	2	2	0	3	5	1	3	1	1	2	1
233	3	2	14	0	1.55	155	37.7	15.692	0	7.26667	6.73333	15.232	65	80	0.8125	0.419355	38.5	20	180	0	35	10	39.437	30	21	25.5	1	1	1	1	1	1	1	1	1	1	1	1	1	1	0	2	3	1	1	1	1	1	1
234	3	2	14	1	1.655	165.5	74.9	27.3455	2	18.5333	15.9333	39.9967	94	102	0.921569	0.567976	22.5	50	178	0	35	10	39.437	38	39	38.5	2	3	3	2	3	3	2	3	3	3	2	3	2	2	3badmidton	1	2	1	3	1	1	1	1
235	3	2	14	0	1.58	158	45.7	18.3064	1	12.2667	10	25.2347	67	90	0.744444	0.424051	29	36	161	0	22	9	34.0486	20	20	20	3	3	3	2	2	2	2	2	2	2	2	2	2	2	3kopmputer	5	5	1	4	2	1	1	1
236	3	2	13	1	1.755	175.5	63.4	20.5842	1	9.73333	7.66667	19.346	81	94	0.861702	0.461538	13	57	201	0	85	12.5	54.236	48	49	48.5	3	2	2	2	2	2	2	3	2	2	2	3	1	1	0	3	5	3	2	2	1	1	1
237	1	2	10	1	1.43	143	44.3	21.6637	2	16.9333	15.3333	37.3347	73.5	82.5	0.890909	0.513986	31.5	39	110	15	18	9	41.511	25	22	23.5	3	3	3	3	3	3	2	2	2	2	2	3	2	2	2hokej	4	4	3	1	3	2	1	2
238	1	2	10	0	1.4	140	28.8	14.6939	1	9	6.46667	17.0067	54	72	0.75	0.385714	23	40	115	7	45	10.5	48.672	16	16	16	2	2	3	1	1	3	2	2	2	2	2	2	2	2	0	3	4	1	2	1	2	1	2
239	1	2	10	0	1.435	143.5	37.1	18.0165	1	16.2667	7.93333	27.574	59.5	82	0.72561	0.414634	31.5	44	140	17	22	9	41.511	22	20	21	2	3	2	2	3	3	2	2	2	2	2	2	2	2	0	5	5	5	5	5	3	5	5
240	1	2	10	0	1.51	151	31.6	13.859	0	11.9333	7.93333	22.3307	54	74	0.72973	0.357616	20	43	97	17	19	9	41.511	22	20	21	3	2	3	2	2	3	2	2	1	2	1	2	3	1	0	1	1	4	1	1	1	2	1
241	1	2	10	1	1.43	143	37.7	18.4361	1	14.8667	9.93333	28.3	70.5	79	0.892405	0.493007	27	37	145	21	26	9.5	43.898	16	18	17	3	3	3	2	3	3	2	2	2	2	2	3	2	2	0	2	4	2	2	1	1	1	2
242	1	2	10	0	1.35	135	26.7	14.6502	1	12.4667	5.2	19.6687	56	69.5	0.805755	0.414815	23	46	145	27	26	9.5	43.898	19	18	18.5	2	3	2	1	3	3	2	2	3	2	2	2	3	2	0	1	1	5	5	5	1	1	4
243	1	2	10	1	1.425	142.5	34.2	16.8421	1	8.2	6.6	16.2	68	76.3	0.891219	0.477193	35	47	160	32	5	8	36.737	24	22	23	3	3	3	3	3	3	2	2	1	2	1	3	2	1	0	5	5	2	2	1	1	1	4
244	1	2	10	0	1.345	134.5	33.6	18.5735	1	11.6667	9.26667	23.6213	63	74	0.851351	0.468401	34.5	49	115	0	22	9	41.511	18	16	17	2	2	2	2	3	3	3	3	3	3	3	1	3	2	0	1	5	3	1	4	4	1	1
245	1	2	10	0	1.32	132	27.8	15.955	1	10	7.86667	19.9107	59	71	0.830986	0.44697	25	46	126	26	20	9	41.511	16	16	16	2	3	2	2	3	3	2	2	3	2	2	2	3	2	0	5	5	5	5	4	5	5	5
246	1	2	10	0	1.35	135	28.4	15.583	1	8.13333	6.06667	15.474	60	71	0.84507	0.444444	42	54	142	37	39	10	46.285	18	15	16.5	3	2	2	3	3	3	2	2	3	2	2	2	2	2	0	1	1	1	1	2	1	1	1
247	1	2	10	1	1.44	144	36.3	17.5058	1	8.13333	6.46667	15.958	66	79	0.835443	0.458333	23	50	167	46	56	11	51.059	24	24	24	3	3	3	2	3	3	2	2	2	2	2	3	2	2	0	2	2	1	1	1	1	1	1
248	3	1	13	1	1.605	160.5	51.7	20.0697	1	17.4	12.2667	34.1887	75	91.5	0.819672	0.46729	26	42	136	14	26	9.5	38.5316	24	21	22.5	2	3	2	1	1	2	1	1	1	1	2	1	1	1	0	1	4	3	3	1	1	1	1
249	3	1	14	1	1.74	174	66.1	21.8325	1	14.1333	10.0667	27.574	78	98	0.795918	0.448276	13	47	175	12	31	10	39.437	34	28	31	2	1	3	3	1	3	3	1	1	1	2	1	1	1	0	3	3	2	1	1	1	1	1
250	3	1	14	1	1.62	162	50.4	19.2044	1	17.9333	10.6	32.8173	76	87.5	0.868571	0.469136	20	52	175	26	48	10.5	42.1312	24	24	24	2	3	2	1	2	3	1	2	1	2	2	3	1	1	0	3	3	3	1	2	1	1	1
251	3	1	14	1	1.565	156.5	41.9	17.1075	1	12.6	8.66667	24.0247	63	80	0.7875	0.402556	15	40	130	5	20	9	34.0486	26	28	27	2	2	2	1	3	2	2	1	1	1	2	2	1	1	0	2	2	3	1	4	1	1	1
252	3	1	14	1	1.57	157	40.1	16.2684	0	7.2	5.26667	13.3767	62	78.5	0.789809	0.394904	9	56	185	20	50	11	44.8254	27	24	25.5	3	3	3	2	2	2	3	3	1	2	2	3	2	1	0	2	4	2	2	1	1	1	2
253	3	1	14	1	1.57	157	37.6	15.2542	0	7	5.46667	13.3767	61	76	0.802632	0.388535	10	55	179	21	50	11	44.8254	27	24	25.5	3	3	3	3	2	3	1	2	1	1	1	3	1	1	0	2	4	3	2	1	1	1	2
254	2	1	12	0	1.53	153	45.6	19.4797	1	15.2667	11.73	30.958	69	84	0.821429	0.45098	38	35	140	13	12	8.5	35.2392	28	30	29	2	3	1	1	3	2	1	1	2	1	1	1	2	3	3śpiew	5	3	1	1	1	2	3	1
255	2	1	11	0	1.38	138	28.2	14.8078	0	10.8	6.93333	19.7493	58	67	0.865672	0.42029	26	31	115	3	18	9	39.6454	14	13	13.5	2	3	2	2	2	3	2	1	2	2	2	2	2	3	0	4	2	1	2	1	1	1	2
256	2	1	11	0	1.42	142	34.9	17.3081	1	9.46667	6	17.0067	62	74	0.837838	0.43662	45	47	120	14	17	9	39.6454	22	22	22	3	3	3	2	3	2	2	2	2	2	2	2	3	3	2grykomp.	3	2	1	1	2	0	1	2
257	2	1	11	0	1.51	151	32.6	14.2976	0	13.9333	6.26667	22.734	56	72	0.777778	0.370861	21	26	80	2	12	8.5	37.1816	16	14	15	2	2	2	2	2	2	2	2	2	2	2	2	3	3	0	2	4	1	2	2	1	1	1
258	3	1	14	1	1.79	179	68.2	21.2852	1	9	7.73333	18.5393	74	90	0.822222	0.413408	33	47	160	29	61	11.5	47.5196	50	48	49	2	2	1	1	3	2	3	1	2	1	2	2	1	2	3jazdamotorem	1	1	1	3	1	1	2	2
259	3	1	13	1	1.69	169	64	22.4082	2	17.2	13.4	35.318	74	96	0.770833	0.43787	20	45	150	9	36	10	41.149	32	31	31.5	2	2	2	2	2	2	1	2	1	2	2	2	1	1	0	2	4	1	2	1	1	1	1
260	3	1	13	1	1.54	154	37.7	15.8964	1	8.46667	5.86667	15.6353	69	77	0.896104	0.448052	20	55	170	30	42	10.5	43.7664	26	24	25	2	2	2	2	3	2	2	2	2	2	2	2	1	2	0	3	5	2	3	1	1	1	3
261	3	1	13	1	1.7	170	48.1	16.6436	1	11.8	5.86667	19.6687	65	80	0.8125	0.382353	32.5	46	195	33	57	11	46.3838	31	31	31	3	3	2	2	3	3	1	2	2	2	1	3	1	1	0	5	5	1	3	2	2	4	1
262	3	1	13	1	1.68	168	58.4	20.6916	1	18.8	13.4	37.254	75	88	0.852273	0.446429	30	28	150	11	20	9	35.9142	25	26	25.5	1	3	2	2	3	3	1	3	1	2	1	2	1	1	0	3	4	1	2	1	1	1	2
263	3	1	13	1	1.6	160	57.8	22.5781	2	16.1333	13.6667	34.35	84	93	0.903226	0.525	29	40	150	15	51	11	46.3838	29	25	27	2	2	2	2	3	2	1	2	1	1	1	2	1	1	0	4	5	1	1	1	2	1	1
264	3	1	13	0	1.64	164	60.5	22.4941	1	22.0667	18.2667	47.0953	86	93	0.924731	0.52439	27	34	130	0	23	9.5	38.5316	28	27	27.5	2	2	3	1	2	2	2	2	1	2	2	1	2	2	0	3	2	2	5	1	1	1	2
265	3	1	13	0	1.61	161	42.8	16.5117	1	7.4	6.13333	14.6673	70	85	0.823529	0.434783	23	39	110	6	25	9.5	38.5316	26	20	23	2	2	3	2	2	2	2	1	2	2	2	1	2	2	0	3	4	2	5	1	1	1	1
266	3	1	13	0	1.51	151	40.5	17.7624	1	9.13333	6.86667	17.652	68	83	0.819277	0.450331	36	27	155	3	30	9.5	38.5316	24	22	23	2	2	3	2	2	2	2	2	2	2	2	2	2	2	0	3	2	2	5	1	1	1	2
267	3	1	13	0	1.67	167	69	24.7409	2	24.6	13.2	44.03	74	98	0.755102	0.443114	49	48	150	8	31	10	41.149	33	31	32	3	2	3	2	3	3	2	2	2	3	2	2	2	3	0	2	1	1	5	1	2	1	2
268	3	1	13	0	1.44	144	32.8	15.8179	0	11	8.33333	21.6853	58	73	0.794521	0.402778	38	49	120	1	20	9	35.9142	20	14	17	2	2	3	2	3	2	2	2	2	2	2	1	2	2	0	3	4	1	2	1	2	1	2
269	3	1	13	0	1.67	167	49.3	17.6772	1	11	6.46667	19.4267	62	82	0.756098	0.371257	39	44	130	5	17	9	35.9142	33	35	34	2	3	2	1	2	2	1	2	3	3	2	1	2	2	0	3	2	3	4	4	3	2	2
270	3	1	13	1	1.7	170	55.9	19.3426	1	3	6	9.182	71	85	0.835294	0.417647	23	39	170	26	101	13.5	59.4708	32	33	32.5	2	2	1	2	3	2	1	2	1	2	1	3	1	1	0	2	1	1	1	1	1	1	1
271	3	1	13	0	1.54	154	36.1	15.2218	0	9.73333	7.6	19.2653	61	77	0.792208	0.396104	28	36	120	1	27	9.5	38.5316	24	20	22	2	2	2	0	2	2	2	3	2	0	2	2	1	2	0	3	2	2	5	1	1	1	2
272	3	1	13	0	1.51	151	38	16.6659	1	8.33333	9.73333	20.1527	66	78	0.846154	0.437086	29	30	110	2	10	8.5	33.2968	20	23	21.5	2	2	3	2	2	2	2	2	0	3	2	1	1	2	0	3	4	1	5	3	3	1	3
273	3	1	13	0	1.57	157	47.5	19.2706	1	13.8667	10.2	27.4127	68	79	0.860759	0.433121	40	28	115	2	15	9	35.9142	28	27	27.5	2	3	2	2	3	2	1	1	2	2	1	1	2	3	0	4	5	1	4	1	1	1	2
274	3	1	13	0	1.65	165	54.8	20.1286	1	13.0667	14.1333	31.204	70	86	0.813953	0.424242	26.5	31	120	0	10	8.5	33.2968	28	25	26.5	2	2	2	2	2	2	2	2	2	2	2	1	1	2	0	2	4	3	4	1	1	1	2
275	3	1	13	0	1.62	162	44.2	16.8419	1	10.3333	6.86667	19.104	63	81	0.777778	0.388889	20	44	170	3	17	9	35.9142	28	30	29	2	3	3	1	2	2	1	2	2	2	2	2	3	3	0	3	2	1	3	1	1	1	2
276	3	1	13	0	1.61	161	53.2	20.5239	1	12.2667	6.46667	20.9593	66	92	0.717391	0.409938	41	41	140	10	31	10	41.149	32	26	29	2	2	3	2	2	2	2	2	2	2	2	2	2	2	0	4	4	1	5	1	1	1	2
277	3	1	13	1	1.65	165	53.5	19.6511	1	6.6	7.2	14.99	71	85	0.835294	0.430303	35	39	170	22	58	11.5	49.0012	34	33	33.5	2	2	2	2	3	3	2	2	1	2	2	3	1	2	0	2	4	1	1	2	1	2	1
278	3	1	13	1	1.68	168	50.7	17.9634	1	7.4	5.93333	14.4253	70	86	0.813953	0.416667	42	30	160	53	53	11	46.3838	44	43	43.5	3	2	2	1	3	2	2	3	2	2	2	3	2	2	0	1	1	0	5	0	0	0	1
279	3	1	15	1	1.51	151	43.4	19.0343	1	5.8	4.93333	11.2793	64	81	0.790123	0.423841	34	41	170	39	71	12	48.809	31	30	30.5	3	2	1	2	2	3	1	2	2	3	2	3	2	2	3parkur	3	5	1	2	1	2	3	4
280	3	1	13	1	1.63	163	47.7	17.9533	1	6.06667	7.26667	14.4253	66	82	0.804878	0.404908	32	52	180	20	71	12	51.6186	35	32	33.5	2	3	2	2	2	2	2	2	2	2	2	3	1	2	0	5	4	1	2	1	1	1	1
281	3	1	13	1	1.7	170	48.1	16.6436	1	9.06667	5	15.3127	66	82	0.804878	0.388235	23	40	150	20	49	11	46.3838	28	26	27	3	2	2	1	3	2	1	2	1	2	2	2	1	1	0	4	5	1	2	1	4	5	2
282	3	1	13	0	1.7	170	53.6	18.5467	1	11	8.06667	21.3627	66	87	0.758621	0.388235	17	38	140	2	23	9.5	38.5316	37	31	34	2	2	2	2	3	3	2	2	1	2	2	1	2	2	0	3	3	1	4	2	1	1	1
283	3	1	13	1	1.73	173	55.9	18.6775	1	10.8	8.33333	21.4433	78	87	0.896552	0.450867	33.5	48	190	22	46	10.5	43.7664	32	32	32	2	3	2	2	2	3	2	2	1	2	2	3	2	2	0	4	4	1	3	1	2	1	1
284	3	1	13	1	1.7	170	58.3	20.173	1	8	6.8	16.2	74	87	0.850575	0.435294	31	36	185	38	42	10.5	43.7664	33	40	36.5	3	3	3	2	2	3	2	3	2	2	3	3	1	1	0	5	5	2	5	1	1	2	1
285	2	1	11	0	1.5	150	42.6	18.9333	1	10	5.4	16.926	60	84	0.714286	0.4	40	40	113	10	21	9	39.6454	20	21	20.5	2	3	3	2	3	3	2	2	2	3	3	3	2	3	0	1	1	2	2	1	2	1	2
286	2	1	11	1	1.46	146	44.2	20.7356	2	17.4	11.6	33.382	74	82	0.902439	0.506849	21	42	110	4	16	9	39.6454	23	24	23.5	3	3	2	2	3	3	2	2	3	2	2	3	1	2	0	2	3	3	2	1	1	1	1
287	2	1	11	1	1.46	146	36	16.8887	1	6.13333	5	11.7633	60	74	0.810811	0.410959	33	50	137	18	25	9.5	42.1092	20	14	17	2	2	3	2	3	3	3	2	3	2	2	3	1	1	0	2	1	2	1	2	1	1	2
288	2	1	11	1	1.48	148	46.3	21.1377	2	13.2	9.93333	26.2833	73	85	0.858824	0.493243	22	43	120	10	16	9	39.6454	18	22	20	2	3	3	0	2	2	2	2	3	2	2	2	2	2	0	3	5	1	1	3	1	1	2
289	2	1	11	1	1.45	145	37.9	18.0262	1	9.2	7.36667	18.3377	68	82	0.829268	0.468966	29	38	129	16	24	9.5	42.1092	22	20	21	2	3	2	2	3	2	2	2	2	2	2	2	2	2	0	4	3	2	1	2	1	1	3
290	2	1	11	1	1.42	142	30.4	15.0764	1	7.73333	5.4	14.1833	60	74	0.810811	0.422535	25	49	129	12	31	10	44.573	24	20	22	3	1	2	1	3	3	1	2	3	2	2	3	2	1	0	5	5	1	3	1	1	2	1
291	2	1	11	1	1.6	160	58.9	23.0078	2	20.8	16.6	43.546	79	95	0.831579	0.49375	20	40	119	0	18	9	39.6454	20	18	19	1	1	1	1	1	1	1	1	1	1	1	1	1	1	0	3	1	1	1	1	1	1	1
292	2	1	11	1	1.47	147	38.3	17.7241	1	13.2667	8.66667	24.8313	66	82	0.804878	0.44898	31	50	110	2	25	9.5	42.1092	19	16	17.5	2	1	2	2	2	1	2	2	1	2	0	2	1	1	0	2	2	1	1	0	2	4	0
293	2	1	11	1	1.57	157	60.1	24.3823	2	23.5333	14.7333	44.5947	84	93	0.903226	0.535032	32	15	114	5	43	10.5	47.0368	28	20	24	2	3	3	2	3	2	1	3	2	3	2	3	2	3	0	5	5	3	4	2	5	5	5
294	2	1	11	1	1.4	140	36	18.3673	1	13.5333	6.2	22.1693	62	78	0.794872	0.442857	36	56	138	7	28	9.5	42.1092	18	19	18.5	2	3	2	2	3	3	2	2	2	2	2	3	2	1	0	0	4	2	1	0	0	1	2
295	2	1	11	1	1.55	155	42.7	17.7732	1	13.7333	7.33333	23.7827	64	83	0.771084	0.412903	23	54	175	25	35	10	44.573	33	30	31.5	3	3	2	2	3	3	3	2	3	2	2	3	1	2	0	5	5	3	4	2	4	3	5
296	2	1	11	1	1.57	157	48.8	19.798	1	15.2667	8.13333	26.606	67	87	0.770115	0.426752	34	38	144	2	29	9.5	42.1092	22	22	22	3	2	2	2	2	3	1	2	1	1	2	3	1	1	0	3	2	1	1	4	1	1	4
297	3	1	13	1	1.57	157	56.3	22.8407	2	19.1333	15.1667	39.795	75	93	0.806452	0.477707	26	49	144	4	26	9.5	38.5316	35	35	35	2	2	2	2	2	2	2	2	0	0	0	0	0	0	0	3	5	1	2	1	1	1	1
298	3	1	13	1	1.66	166	58.2	21.1206	1	17.4	13.1667	35.2777	72	92	0.782609	0.433735	35	43	132	2	26	9.5	38.5316	29	30	29.5	2	3	1	3	3	3	1	2	2	3	1	3	2	1	0	3	1	1	2	1	1	2	2
299	3	1	13	0	1.59	159	51.3	20.2919	1	14.2	6.93333	23.8633	70	91	0.769231	0.440252	45	40	142	0	35	10	41.149	28	27	27.5	2	3	2	2	2	3	2	2	3	2	2	1	3	3	0	2	2	3	3	1	1	2	1
300	3	1	14	1	1.64	164	50	18.5901	1	6.46667	11.2667	19.7493	69	85	0.811765	0.420732	17	52	196	35	74	12	50.2138	37	33	35	3	3	2	2	3	3	2	2	2	3	3	3	1	3	0	2	1	1	5	1	2	5	2
301	3	1	13	1	1.65	165	54	19.8347	1	14.2	10.1	27.695	71	86	0.825581	0.430303	21	52	143	23	50	11	46.3838	32	27	29.5	2	3	3	3	3	3	2	2	2	2	2	3	2	1	0	2	2	2	2	2	2	2	1
302	3	1	13	1	1.54	154	56.9	23.9922	2	28.6	18.1667	54.8797	90	94	0.957447	0.584416	24	41	133	10	20	9	35.9142	26	29	27.5	2	2	2	2	2	2	2	2	2	2	2	3	2	2	0	4	1	1	2	2	1	1	1
303	3	1	13	1	1.57	157	44	17.8506	1	16.0333	6.1	25.0733	67	82	0.817073	0.426752	37	43	151	13	31	10	41.149	28	30	29	2	2	2	2	2	2	2	2	2	2	2	3	2	2	0	4	5	1	1	1	1	2	1
304	2	1	12	1	1.5	150	39.6	17.6	1	10.8667	4.8	17.2487	62	83	0.746988	0.413333	33	30	147	3	51	11	47.9422	24	22	23	3	3	3	3	0	3	2	2	1	1	2	3	1	3	3pompki	1	5	1	5	1	1	1	3
305	1	1	9	0	1.27	127	27.4	16.988	1	17.8	10.6	32.656	63	71	0.887324	0.496063	35	41	121	5	19	9	43.3766	14	12	13	3	2	2	2	3	3	3	2	1	2	2	3	3	3	0	1	2	1	3	1	1	1	4
306	1	1	9	0	1.41	141	40.5	20.3712	2	19.9333	17.8667	44.03	75	84	0.892857	0.531915	34	55	106	19	22	9	43.3766	22	20	21	3	3	2	1	3	3	2	2	3	1	3	2	3	3	0	2	1	4	1	2	2	1	3
307	1	1	9	1	1.36	136	29.1	15.7331	1	12.6667	8.93333	24.428	61	72	0.847222	0.448529	23.5	51	170	17	23	9.5	45.6868	20	16	18	2	2	1	2	2	2	2	1	1	1	2	2	1	2	0	2	2	2	2	1	0	1	1
308	1	1	9	0	1.41	141	30.2	15.1904	1	11.8667	9.86667	24.5893	60	73	0.821918	0.425532	30	51	111	3	22	9	43.3766	10	12	11	2	2	2	1	3	2	2	1	1	1	1	2	2	0	0	2	2	1	2	3	1	1	4
309	1	1	9	0	1.45	145	42.4	20.1665	2	17.8	14.8	37.738	74	81	0.91358	0.510345	23	45	88	5	13	8.5	41.0664	20	19	19.5	2	3	3	2	3	3	2	2	2	2	2	3	3	2	0	1	3	5	1	2	1	1	3
310	1	1	9	0	1.32	132	25.4	14.5776	1	10.7667	7.86667	20.8383	56	69	0.811594	0.424242	31	49	87	0	24	9.5	45.6868	12	13	12.5	2	3	2	3	3	3	3	3	3	3	2	1	3	3	0	1	2	1	3	1	1	4	2
311	1	1	9	1	1.51	151	38.8	17.0168	1	11.8	9.06667	23.5407	65	80	0.8125	0.430464	36	50	174	8	31	10	47.997	30	29	29.5	2	2	3	2	2	2	2	2	2	2	2	2	2	2	2pingpong	4	3	1	2	4	1	1	3
312	1	1	9	0	1.39	139	36.5	18.8914	1	20.6667	15.9333	42.578	68	80	0.85	0.489209	23.5	44	86	0	10	8.5	41.0664	10	13	11.5	2	2	2	2	2	2	2	2	2	2	2	2	2	3	0	4	2	1	1	2	1	1	5
313	1	1	9	1	1.3	130	26.4	15.6213	1	13.8	8.4	25.154	60	71	0.84507	0.461538	28	56	137	19	11	8.5	41.0664	14	12	13	2	2	2	2	2	2	2	1	1	2	1	2	1	2	0	3	3	5	1	3	2	1	1
314	1	1	9	1	1.34	134	29.1	16.2063	1	11.0667	7.8	21.1207	63	73	0.863014	0.470149	26	48	123	15	25	9.5	45.6868	21	18	19.5	3	3	2	2	2	2	2	2	1	2	2	3	2	1	0	2	2	2	1	2	1	1	1
315	1	1	9	1	1.31	131	27	15.7333	1	11.3	8.13333	21.8063	55	66	0.833333	0.419847	27	63	129	27	16	9	43.3766	18	15	16.5	3	3	2	3	2	3	2	2	2	1	1	3	2	1	2pingpong	2	1	3	2	4	3	1	4
316	1	1	9	0	1.46	146	44.1	20.6887	2	28.9333	21.8	59.6793	71	84	0.845238	0.486301	30	26	55	0	9	8.5	41.0664	14	14	14	3	2	2	2	2	3	1	2	1	2	2	2	2	2	0	2	1	2	1	2	2	1	2
317	1	1	9	0	1.44	144	31	14.9498	1	13.3333	7.33333	23.2987	61	73	0.835616	0.423611	34	40	78	5	17	9	43.3766	16	17	16.5	2	2	2	2	3	2	2	2	2	1	2	2	1	2	0	2	0	1	2	1	3	1	2
318	1	1	9	0	1.23	123	24.5	16.1941	1	11.6667	8.26667	22.4113	55	68	0.808824	0.447154	33	50	120	4	26	9.5	45.6868	14	14	14	3	3	2	2	3	3	3	2	3	3	2	1	3	3	0	1	3	4	1	5	5	3	4
319	1	1	9	1	1.4	140	33.6	17.1429	1	11.1333	8	21.4433	62	74	0.837838	0.442857	21	52	142	13	27	9.5	45.6868	23	23	23	3	3	3	3	2	2	2	1	1	2	2	3	2	1	0	1	4	4	1	1	1	1	3
320	1	1	9	0	1.33	133	30.1	17.0162	1	12.8667	10.1333	26.122	62	71	0.873239	0.466165	37	45	94	3	26	9.5	45.6868	18	15	16.5	2	2	2	2	3	3	2	2	2	2	2	2	3	3	3gimnastyka	2	2	1	3	2	1	1	2
321	1	1	9	1	1.36	136	28	15.1384	1	9.8	8.46667	20.3947	58	72	0.805556	0.426471	31	64	95	17	30	9.5	45.6868	18	18	18	2	2	2	2	2	2	3	1	1	1	2	1	1	2	2skakanie	1	1	1	1	1	1	1	1
322	1	1	9	0	1.42	142	36.4	18.052	1	13.7333	10.7333	27.8967	71	80	0.8875	0.5	43	46	103	0	13	8.5	41.0664	21	12	16.5	2	2	2	2	2	3	2	1	2	1	2	2	2	3	3plastyka	4	1	1	2	2	1	1	2
323	1	1	9	1	1.44	144	43.7	21.0745	2	23.2667	14.8667	44.4333	73	86	0.848837	0.506944	41	42	108	16	13	8.5	41.0664	24	24	24	2	3	3	1	2	2	2	1	2	2	3	3	1	1	2skokwdal	4	5	1	1	1	1	1	2
324	1	1	9	0	1.29	129	24.5	14.7227	1	12.9333	8.13333	23.7827	58	68	0.852941	0.449612	27	41	96	19	12	8.5	41.0664	13	12	12.5	2	2	2	2	2	2	2	1	2	2	2	1	1	2	0	3	4	1	3	2	4	1	1
325	1	1	9	0	1.4	140	34.9	17.8061	1	23.6	10.6	39.674	68	77	0.883117	0.485714	27	44	112	0	16	9	43.3766	18	18	18	2	2	2	2	2	3	1	1	1	1	1	2	2	1	3plastyka	2	1	1	1	1	1	1	2
326	1	1	9	1	1.42	142	33.8	16.7625	1	16.3333	11.5333	32.0107	70	75	0.933333	0.492958	21	37	86	0	10	8.5	41.0664	12	12	12	1	2	2	1	2	1	2	1	1	1	2	1	1	2	1piłkaręczna	2	1	2	1	1	1	1	2
327	1	1	9	1	1.48	148	43.8	19.9963	2	21.3333	16.0667	43.546	76	83	0.915663	0.513514	23	34	100	1	13	8.5	41.0664	18	18	18	2	2	3	2	2	3	2	1	2	1	2	2	1	1	0	4	2	1	2	3	1	1	2
328	1	1	9	1	1.42	142	32.6	16.1674	1	11.7333	9.06667	23.46	65	72	0.902778	0.457746	15	37	130	3	9	8.5	41.0664	15	12	13.5	3	3	2	2	2	3	3	2	3	3	2	3	2	3	3pompki	1	5	1	1	1	1	4	5
329	1	1	9	1	1.39	139	36.1	18.6843	1	16	13.8667	34.4307	74	82	0.902439	0.532374	14	15	81	3	9	8.5	41.0664	22	17	19.5	2	2	2	3	3	3	2	2	2	1	3	2	1	3	0	5	1	2	1	4	1	2	1
330	1	1	9	0	1.37	137	32.8	17.4756	1	17.2	9.46667	30.5587	65	77	0.844156	0.474453	24	38	57	0	19	9	43.3766	13	17	15	2	3	3	2	2	2	2	2	1	1	3	2	2	3	0	1	2	3	1	1	2	1	2
331	1	1	9	0	1.39	139	31.5	16.3035	1	17.8	9.93333	31.8493	58	71	0.816901	0.417266	33	39	113	4	15	9	43.3766	18	14	16	3	2	2	2	3	3	2	2	3	3	2	3	3	3	0	2	1	1	3	2	1	1	2
332	2	1	11	0	1.36	136	25	13.5164	0	8.2	6.6	16.2	60	70	0.857143	0.441176	35	39	110	4	27	9.5	42.1092	11	11	11	3	1	1	2	3	2	2	3	2	2	3	3	3	3	0	2	1	2	1	0	1	2	4
333	1	1	9	0	1.69	169	77.3	27.0649	3	27.0667	20.6667	56.0493	89	110	0.809091	0.526627	24.5	29	124	0	8	8.5	41.0664	32	30	31	3	3	2	1	2	2	2	2	1	2	2	2	2	3	1piłkaręczna	3	3	1	2	1	1	1	5
334	1	1	9	0	1.42	142	28.2	13.9853	0	10.4667	8.6	21.3627	61	73	0.835616	0.429577	22	37	102	8	13	8.5	41.0664	13	14	13.5	2	2	2	1	2	3	1	2	3	3	2	3	2	1	0	2	1	2	1	4	1	2	4
335	2	1	11	1	1.43	143	35.6	17.4092	1	10.9333	8.66667	22.008	69	80	0.8625	0.482517	27	41	96	16	16	9	39.6454	20	20	20	3	3	2	2	3	2	3	3	3	2	2	3	1	1	0	2	1	2	1	1	1	1	2
336	1	2	10	1	1.46	146	38	17.827	1	14.4	6.73	23.8593	66	78	0.846154	0.452055	36	51	170	16	32	10	46.285	24	18	21	2	2	1	1	1	1	1	1	1	1	1	2	1	1	0	5	5	1	1	1	1	1	1
337	1	2	10	1	1.35	135	31	17.0096	1	11.6	6.2	19.83	64	72	0.888889	0.474074	26	38	155	12	44	10.5	48.672	20	16	18	3	2	2	2	3	2	2	1	1	3	3	3	2	2	0	4	3	1	1	1	1	2	1
338	1	2	10	1	1.34	134	29	16.1506	1	7.13	4.9	12.8483	61	72	0.847222	0.455224	27	51	135	14	34	10	46.285	16	16	16	2	2	1	2	3	2	1	2	1	1	1	3	2	1	0	5	3	1	1	1	5	1	1
339	1	2	10	1	1.38	138	33	17.3283	1	9.06	5.86	16.3452	62	71.5	0.867133	0.449275	22	49	135	17	11	8.5	39.124	20	20	20	2	2	2	2	3	1	1	1	1	1	1	1	1	2	0	5	3	3	4	1	1	4	5
340	1	2	10	1	1.32	132	48	27.5482	3	24.1	22	54.073	84.5	87	0.971264	0.640152	28	35	110	0	11	8.5	39.124	22	24	23	2	2	2	2	3	2	3	2	1	2	3	2	3	2	0	5	2	3	1	5	1	1	2
341	1	2	10	1	1.39	139	33	17.0799	1	6.8	4.46	11.9166	62	77	0.805195	0.446043	27	53	160	13	17	9	41.511	25	27	26	2	3	3	2	2	1	1	2	1	1	1	1	2	2	0	5	3	1	1	2	2	1	2
342	1	2	10	1	1.29	129	24	14.4222	0	8.06	4.53	13.5259	56	64.5	0.868217	0.434109	18	40	105	11	18	9	41.511	13	12	12.5	2	2	3	2	2	2	3	3	1	3	2	2	3	2	0	1	2	1	1	2	1	1	1
343	1	2	10	1	1.35	135	28	15.3635	1	10.06	7.93	20.0599	62	67.5	0.918519	0.459259	60	12	125	7	11	8.5	39.124	15	13	14	1	1	2	2	2	1	1	1	2	2	1	2	1	1	0	3	1	1	1	1	1	2	1
344	1	2	10	1	1.36	136	27	14.5978	0	8.73	7.4	17.8093	60	68.5	0.875912	0.441176	9	36	120	11	16	9	41.511	18	14	16	2	2	3	2	2	2	1	3	1	2	3	2	1	1	0	2	3	1	1	2	3	3	3
345	1	2	10	0	1.35	135	31	17.0096	1	16.46	14.26	35.4632	72	76	0.947368	0.533333	13	50	110	12	17	9	41.511	12	12	12	2	2	2	2	2	2	2	2	2	1	1	1	2	2	0	5	4	1	1	1	1	2	4
346	1	2	10	0	1.23	123	24	15.8636	1	8.5	6.06	15.9096	58	63	0.920635	0.471545	26	48	105	25	20	9	41.511	10	10	10	2	3	3	2	1	2	2	1	1	1	1	1	1	1	0	5	3	1	2	2	1	1	1
347	1	2	10	0	1.24	124	26	16.9095	1	6.93	4.93	12.6426	57	70.5	0.808511	0.459677	29	46	100	17	9	8.5	39.124	16	14	15	1	2	2	2	2	2	1	2	1	2	1	1	1	3	0	3	2	2	1	2	1	1	2
348	1	2	10	0	1.41	141	36	18.1077	1	15.7	11.33	30.9983	70.5	77.5	0.909677	0.5	22	36	105	0	8	8.5	39.124	14	16	15	2	2	2	2	1	1	1	1	2	1	1	1	1	2	0	3	2	2	3	2	1	2	4
349	1	2	10	0	1.44	144	42	20.2546	2	17.63	12.66	34.9429	71	83	0.855422	0.493056	24	44	145	10	10	8.5	39.124	16	16	16	2	2	3	1	1	1	2	1	2	1	1	1	2	2	0	3	4	2	1	1	1	1	2
350	1	2	10	0	1.48	148	40	18.2615	1	14.2	10.4	28.058	66	84	0.785714	0.445946	19	52	120	10	10	8.5	39.124	17	17	17	1	1	2	1	1	1	1	1	1	1	1	1	1	2	0	5	2	1	2	1	1	1	2
351	1	2	10	0	1.42	142	44	21.8211	2	16.96	20.33	43.4129	81.5	87.5	0.931429	0.573944	25	53	80	0	9	8.5	39.124	20	19	19.5	3	3	2	3	3	3	2	2	1	3	1	1	3	3	0	1	1	5	1	1	5	1	5
352	1	2	10	0	1.4	140	52	26.5306	3	15.4	12.93	32.5713	72	86	0.837209	0.514286	26	40	95	1	14	8.5	39.124	22	20	21	2	2	3	3	3	2	2	1	1	1	2	1	3	3	0	1	2	1	1	3	2	1	3
353	2	2	12	1	1.45	145	33.5	15.9334	1	11.8	6.2	20.072	65	73	0.890411	0.448276	29	57	175	50	71	12	53.0234	18	18	18	3	3	3	3	2	3	2	2	1	3	2	3	1	1	0	2	2	1	2	2	1	1	2
354	2	2	12	1	1.45	145	35	16.6468	1	7.93	6.26	15.4619	62	78	0.794872	0.427586	27	40	160	13	40	10.5	45.4016	20	19	19.5	2	2	2	2	2	3	2	2	2	2	2	3	2	1	0	2	5	1	2	2	1	1	1
355	2	2	12	1	1.55	155	51	21.2279	2	25.2	15.13	47.0913	80	82	0.97561	0.516129	24	48	140	35	36	10	42.861	25	24	24.5	3	3	2	3	3	3	2	2	3	2	2	3	2	1	0	1	3	1	3	4	1	2	2
356	2	2	12	0	1.48	148	40.5	18.4898	1	18.26	10.13	32.6439	73	80.5	0.906832	0.493243	28	48	120	8	27	9.5	40.3204	20	18	19	2	3	2	2	3	3	2	2	3	3	2	2	2	2	0	1	1	1	1	2	1	1	1
357	2	2	12	0	1.54	154	43.5	18.342	1	14.66	8.06	25.7832	74	82	0.902439	0.480519	25	50	170	1	34	10	42.861	19	14	16.5	2	2	3	2	3	3	2	2	2	2	2	2	3	3	0	3	4	2	3	1	1	1	2
358	2	2	12	0	1.64	164	72.5	26.9557	3	32.76	27.53	71.2429	100	103	0.970874	0.609756	25	26	120	0	14	8.5	35.2392	30	25	27.5	2	3	2	2	3	3	2	2	3	2	1	1	2	3	0	1	2	2	4	1	1	1	2
359	2	2	12	0	1.45	145	29	13.7931	0	9.66	5.4	16.5146	63	70	0.9	0.434483	21	38	127	0	20	9	37.7798	20	18	19	2	2	2	1	2	3	2	2	2	2	2	2	2	2	0	2	2	4	2	1	1	1	2
360	2	2	12	1	1.47	147	37	17.1225	1	9.46	6.13	17.1559	71	73	0.972603	0.482993	26	52	183	40	70	12	53.0234	24	24	24	2	3	2	2	2	3	1	2	2	2	2	3	1	1	0	3	4	1	1	2	1	1	1
361	2	2	12	0	1.47	147	34.5	15.9656	1	11.46	6.53	20.0599	60	121	0.495868	0.408163	37.5	45	148	3	27	9.5	40.3204	22	22	22	3	2	3	2	2	3	2	2	2	3	2	2	2	3	0	4	4	2	3	2	2	1	2
362	2	2	12	0	1.62	162	39.5	15.0511	0	11.2	7.2	20.556	64	110	0.581818	0.395062	34	47	140	0	43	10.5	45.4016	21	21	21	3	2	2	3	2	3	2	2	2	3	1	3	2	1	0	3	1	5	2	3	1	4	5
363	2	2	12	1	1.49	149	59	26.5754	3	25.36	24.6	58.7436	88	89	0.988764	0.590604	14.5	26	115	10	13	8.5	35.2392	31	28	29.5	2	3	1	1	3	3	1	1	2	2	3	1	1	1	0	5	5	1	3	1	1	1	1
364	2	2	12	1	1.44	144	33.5	16.1555	1	6.26	5.93	13.0419	63.5	69.5	0.913669	0.440972	23	53	130	42	43	10.5	45.4016	18	21	19.5	3	3	2	3	3	3	2	2	3	2	2	3	2	1	0	3	3	1	3	1	1	1	2
365	2	2	12	1	1.56	156	51	20.9566	1	15.13	10.2	28.9413	71.5	85	0.841176	0.458333	16	49	135	14	35	10	42.861	26	26	26	2	3	1	2	3	3	2	1	1	2	1	3	1	1	0	1	3	2	2	1	4	3	2
366	2	2	12	1	1.5	150	40.5	18	1	12	9.4	24.186	70	75	0.933333	0.466667	18.5	33	160	12	17	9	37.7798	25	24	24.5	3	3	3	3	1	2	1	2	1	2	1	3	1	2	0	1	3	1	1	1	1	1	1
367	2	2	12	1	1.37	137	33.5	17.8486	1	12.1	6.86	21.2336	66	75	0.88	0.481752	20.5	44	130	35	26	9.5	40.3204	18	20	19	2	2	1	1	2	2	1	1	1	2	2	2	1	1	0	2	1	2	2	1	1	1	2
368	2	2	12	1	1.46	146	45.5	21.3455	2	24.46	12.6	43.1346	80	84	0.952381	0.547945	13	36	160	17	14	8.5	35.2392	22	20	21	2	2	2	1	2	2	1	1	2	2	2	3	1	1	0	3	3	2	2	1	1	1	2
369	2	2	12	0	1.47	147	34.5	15.9656	1	22.93	21	51.4473	88	93	0.946237	0.598639	23.5	40	110	0	23	9.5	40.3204	22	19	20.5	3	2	3	2	2	3	2	2	2	3	2	2	2	3	0	4	2	1	2	2	1	2	2
370	2	2	12	1	1.51	151	48	21.0517	1	16.2	13	33.624	75	80	0.9375	0.496689	30	55	165	36	54	11	47.9422	22	20	21	3	3	2	2	3	3	1	2	1	2	2	3	1	1	0	4	3	1	3	2	1	1	2
371	2	2	12	0	1.48	148	39	17.805	1	24.6	11.26	41.6826	73	80	0.9125	0.493243	25	37	140	1	27	9.5	40.3204	20	18	19	3	2	3	1	2	3	2	2	2	2	2	2	2	3	0	4	3	4	2	3	1	4	5
372	3	2	14	0	1.51	151	33	14.473	0	7.06	13.06	22.6372	56	73	0.767123	0.370861	32	49	178	2	27	9.5	36.7428	24	22	23	2	2	3	1	2	3	1	2	2	2	2	2	2	2	0	3	3	1	2	1	1	1	2
373	3	2	14	0	1.66	166	55	19.9594	1	13.86	12.9	30.6716	68	87	0.781609	0.409639	31	42	195	0	52	11	44.8254	30	26	28	2	3	3	2	3	2	1	2	2	2	2	2	1	2	0	4	5	2	5	1	1	2	1
374	3	2	14	1	1.7	170	51	17.6471	1	11.3	7.8	21.403	63	87	0.724138	0.370588	19	40	150	15	51	11	44.8254	36	30	33	3	3	3	2	2	3	2	2	2	2	2	2	2	2	0	4	4	1	2	1	1	1	1
375	3	2	14	1	1.5	150	38.5	17.1111	1	16.2	8.76	28.4936	60	77	0.779221	0.4	27	38	160	25	30	9.5	36.7428	24	27	25.5	3	3	3	2	2	2	2	2	2	2	2	2	2	2	0	2	1	1	2	1	1	1	2
376	3	2	14	0	1.66	166	58	21.048	1	25.06	26.13	60.2319	77	98	0.785714	0.463855	26	34	175	0	37	10	39.437	32	34	33	2	3	3	3	3	3	3	2	3	3	2	2	2	3	0	5	5	1	2	5	2	5	4
377	3	2	14	0	1.6	160	45	17.5781	1	14.4	9.86	27.6466	61	84	0.72619	0.38125	31	38	174	0	34	10	39.437	24	24	24	3	2	2	2	3	3	2	2	2	2	2	2	2	2	0	3	4	2	2	3	3	3	3
378	3	2	14	0	1.55	155	44.5	18.5224	1	8.06	8.06	17.7972	64	78	0.820513	0.412903	28	47	178	1	38	10	39.437	36	30	33	2	2	3	2	2	2	3	2	2	2	2	1	2	2	0	3	3	2	4	3	1	3	2
379	3	2	14	0	1.64	164	65	24.1672	2	27.06	22.6	58.3806	70	93	0.752688	0.426829	29	50	160	0	33	10	39.437	38	32	35	2	3	3	2	3	3	1	1	3	3	2	2	1	3	0	4	3	2	5	1	4	5	5
380	3	2	14	1	1.6	160	52	20.3125	1	28.06	13.33	48.3739	66	87	0.758621	0.4125	25	47	135	8	28	9.5	36.7428	30	30	30	2	3	2	2	2	3	1	2	3	3	2	3	1	1	0	4	4	3	1	1	1	1	2
381	3	2	14	1	1.71	171	77	26.3329	2	26	29.26	65.1566	92	103	0.893204	0.538012	26	48	195	28	29	9.5	36.7428	53	48	50.5	2	3	2	1	3	3	2	2	2	3	2	3	1	1	0	4	1	1	5	3	2	4	5
382	3	2	14	0	1.6	160	52	20.3125	1	14.53	12.53	31.0346	67	90	0.744444	0.41875	27	38	168	0	59	11.5	47.5196	22	24	23	3	2	2	2	2	3	3	2	2	2	1	1	3	3	0	4	4	1	1	1	1	5	1
383	3	2	14	0	1.57	157	51	20.6905	1	22.13	20	49.2693	69	92	0.75	0.43949	23	36	162	0	23	9.5	36.7428	30	28	29	3	3	3	2	3	3	2	2	3	1	1	1	1	1	0	5	5	3	3	1	2	1	2
384	3	2	14	1	1.65	165	61	22.4059	1	20.13	10.73	35.6326	78	94	0.829787	0.472727	25	50	185	24	38	10	39.437	34	38	36	2	3	2	2	3	3	2	3	2	3	3	3	2	1	0	3	4	2	5	1	1	5	1
385	3	2	14	1	1.65	165	52	19.1001	1	15.13	8.46	26.8359	63	88	0.715909	0.381818	20	44	160	30	72	12	50.2138	32	28	30	2	2	3	2	2	2	1	1	1	2	2	3	1	2	0	4	5	1	2	1	1	2	1
386	3	2	14	1	1.56	156	51	20.9566	1	10.43	7.46	19.9389	73	88	0.829545	0.467949	25	48	190	17	34	10	39.437	29	30	29.5	2	2	2	2	2	2	2	1	2	2	1	2	1	1	0	2	2	2	2	5	5	5	2
387	3	2	14	0	1.62	162	44.5	16.9563	1	18.26	8.13	30.2239	61	81	0.753086	0.376543	28	47	165	16	40	10.5	42.1312	30	24	27	2	1	3	1	2	2	1	2	2	2	2	2	2	3	0	4	4	3	3	2	2	4	3
388	3	2	14	0	1.65	165	57	20.9366	1	25.13	9.86	40.6299	67	88	0.761364	0.406061	26	44	160	0	34	10	39.437	30	30	30	2	3	3	3	3	3	2	2	2	3	2	2	1	3	0	4	3	3	1	2	2	3	1
389	3	2	14	1	1.66	166	66.5	24.1327	2	8.66	7.93	18.3659	73	89	0.820225	0.439759	32	65	24	45	77	12	50.2138	61	60	60.5	2	3	2	2	3	1	2	1	2	1	3	1	1	1	0	4	4	1	2	1	1	1	1
390	3	2	14	1	1.58	158	47	18.8271	1	14.93	6.93	24.7426	68	80	0.85	0.43038	23	41	170	4	52	11	44.8254	27	25	26	2	1	2	2	1	2	3	1	1	2	2	3	1	1	0	3	5	3	2	5	3	5	4
391	3	2	14	1	1.61	161	41.5	16.0102	0	9.03	6.46	17.0349	61	80	0.7625	0.378882	27	50	195	32	34	10	39.437	26	24	25	3	3	3	2	3	2	2	2	2	2	3	2	1	2	0	4	4	3	4	2	3	1	3
392	3	2	14	1	1.53	153	38	16.2331	0	6.86	5.4	13.1266	60	76	0.789474	0.392157	28	62	185	30	40	10.5	42.1312	32	32	32	2	2	2	2	2	2	2	2	1	2	2	3	2	1	0	1	2	1	3	1	1	1	2
393	3	2	14	1	1.74	174	60	19.8177	1	11.86	9.13	23.6899	70	92	0.76087	0.402299	24	50	210	15	58	11.5	47.5196	44	42	43	2	2	3	2	3	3	2	3	2	2	2	3	1	1	0	3	1	1	1	1	1	1	1
394	3	2	14	1	1.64	164	43	15.9875	0	11.06	6.26	19.2492	64	79	0.810127	0.390244	25	43	185	30	70	12	50.2138	31	32	31.5	1	1	1	1	1	1	1	2	1	2	2	3	1	1	0	3	1	1	1	2	1	1	2
395	3	2	14	1	1.71	171	54	18.4672	1	13.4	7.7	23.823	70	84	0.833333	0.409357	22	40	200	21	39	10	39.437	40	38	39	2	2	2	2	2	2	2	2	2	2	2	2	1	2	0	2	2	2	3	1	2	1	1
396	3	2	14	1	1.7	170	58	20.0692	1	12.93	9	24.8273	69	90	0.766667	0.405882	27	49	240	32	71	12	50.2138	60	56	58	2	2	3	2	2	1	1	1	1	2	1	2	1	1	0	2	2	1	1	1	1	1	1
397	3	2	14	1	1.58	158	57	22.8329	2	20.2	16.06	42.1666	76	90	0.844444	0.481013	28	43	200	28	43	10.5	42.1312	36	32	34	3	3	3	3	2	3	2	2	2	3	2	3	2	2	0	2	4	1	3	1	1	1	1
398	3	2	14	1	1.57	157	48	19.4734	1	23.86	13.06	42.9652	76	85	0.894118	0.484076	31	50	175	33	50	11	44.8254	30	28	29	3	3	2	2	3	2	3	2	3	2	2	3	1	2	0	2	3	4	2	1	2	3	2
399	3	2	14	1	1.56	156	41	16.8475	1	13.73	6.73	23.0486	65	79	0.822785	0.416667	30	58	190	33	76	12	50.2138	28	26	27	2	3	2	2	2	3	2	2	2	2	2	3	2	2	0	4	4	1	2	1	1	3	1
400	3	2	14	1	1.79	179	66	20.5986	1	13.86	15.1	33.3336	74	94	0.787234	0.413408	26	46	200	29	37	10	39.437	36	37	36.5	3	3	1	2	3	3	2	2	1	2	2	3	1	3	0	3	5	1	4	1	2	3	3
401	3	2	14	1	1.68	168	52.5	18.6012	1	12.4	10.2	25.638	70	86	0.813953	0.416667	27	50	210	32	54	11	44.8254	34	40	37	3	2	2	2	2	2	2	2	1	2	2	2	1	1	0	3	4	4	3	2	2	2	2
402	1	2	10	1	1.47	147	45	20.8247	2	24.13	16.33	47.2486	75	81	0.925926	0.510204	25	49	125	13	10	8.5	39.124	26	24	25	3	3	2	2	3	3	2	3	1	2	1	3	1	1	2-ping-pong	3	3	2	1	4	1	1	2
403	1	2	10	1	1.48	148	53	24.1965	3	32.73	31.53	76.0466	78	90	0.866667	0.527027	27	31	115	12	6	8	36.737	24	24	24	2	3	3	1	3	3	3	2	3	1	3	3	1	1	0	2	5	1	1	5	1	2	5
404	1	2	10	0	1.41	141	34	17.1018	1	19.26	14.33	38.9359	61	74	0.824324	0.432624	30	33	128	1	11	8.5	39.124	14	16	15	2	3	2	2	2	3	2	1	2	2	2	2	2	3	2-ping-pong	4	4	2	4	2	3	6	3
405	1	2	10	0	1.35	135	30	16.4609	1	13.86	7.73	24.4159	57	66	0.863636	0.422222	28	54	120	0	8	8.5	39.124	20	18	19	2	3	3	2	3	3	2	2	3	2	2	1	2	3	2-ping-pong	3	3	2	3	3	2	2	4
406	1	2	10	1	1.4	140	34.5	17.602	1	10.46	6.4	18.6926	61	77	0.792208	0.435714	32	50	150	17	26	9.5	43.898	18	20	19	1	1	1	2	2	1	2	2	1	1	2	1	2	2	0	2	2	2	2	3	1	2	2
407	1	2	10	0	1.34	134	38.5	21.4413	2	19.2	17.3	42.457	68	80	0.85	0.507463	26	45	95	0	7	8.5	39.124	17	12	14.5	2	2	2	2	2	2	2	2	2	2	2	2	2	2	0	2	1	2	3	3	1	2	2
408	1	2	10	1	1.5	150	39	17.3333	1	8.86	6.93	17.3979	61	74	0.824324	0.406667	25	50	135	12	16	9	41.511	26	28	27	3	3	2	3	2	3	1	2	2	2	2	2	2	1	0	1	2	1	1	1	1	1	2
409	1	2	10	1	1.44	144	34	16.3966	1	12.73	8.73	24.2586	61	77	0.792208	0.423611	25	37	105	4	15	9	41.511	19	20	19.5	2	2	2	2	2	2	2	2	1	1	1	1	1	1	0	3	2	1	1	1	2	2	2
410	1	2	10	0	1.42	142	36.5	18.1016	1	12.73	9.8	25.5533	62	76	0.815789	0.43662	32	58	136	4	14	8.5	39.124	24	26	25	3	2	3	2	2	3	2	2	2	2	2	2	2	3	2-jazdananartach	4	4	1	4	2	2	2	2
411	1	2	10	1	1.3	130	27	15.9763	1	9.8	8	19.83	54	71	0.760563	0.415385	30	53	135	10	11	8.5	39.124	20	18	19	3	2	2	2	2	2	2	2	2	2	2	1	1	1	0	4	4	5	1	2	2	1	1
412	1	2	10	0	1.43	143	33	16.1377	1	13.2	9.33	25.5533	60	75	0.8	0.41958	29	31	95	1	13	8.5	39.124	20	18	19	3	2	3	2	2	2	3	2	3	2	2	1	2	2	0	3	3	2	3	4	1	1	2
413	1	2	10	1	1.46	146	40	18.7652	1	12.33	9.86	25.1419	63	81	0.777778	0.431507	28	39	138	15	19	9	41.511	27	24	25.5	2	3	2	2	3	2	2	3	1	1	2	3	1	1	2-karate,ping-pong	4	2	2	3	5	3	1	1
414	1	2	10	1	1.34	134	34.5	19.2136	1	19.46	10.2	34.1806	61	77	0.792208	0.455224	31	32	105	7	10	8.5	39.124	18	15	16.5	2	3	3	2	3	3	3	3	1	2	3	2	3	1	3-karate	2	5	2	4	3	1	5	1
415	1	2	10	1	1.45	145	35	16.6468	1	5.36	6	12.0376	61	69	0.884058	0.42069	29	42	130	20	28	9.5	43.898	21	19	20	3	2	3	2	2	2	2	1	2	1	2	3	1	1	2-piłkaręczna	3	3	1	1	1	1	1	2
416	1	2	10	0	1.37	137	31	16.5166	1	10.26	6.13	18.1239	62	68	0.911765	0.452555	33	31	115	1	19	9	41.511	12	12	12	2	2	3	2	1	2	2	1	3	2	2	1	3	3	0-piłkaręczna	2	3	1	3	1	1	1	1
417	1	2	10	1	1.35	135	28	15.3635	1	10.6	8	20.798	59	65	0.907692	0.437037	34	45	120	0	23	9.5	43.898	16	13	14.5	3	3	2	2	2	3	2	1	2	1	1	1	1	1	0	1	2	1	4	4	1	1	1
418	1	2	10	0	1.59	159	64	25.3155	3	26.06	26	61.2846	80	98	0.816327	0.503145	28	25	75	0	11	8.5	39.124	28	30	29	3	3	3	2	1	2	3	2	3	2	2	2	3	2	0	1	2	1	1	4	1	2	3
419	1	2	10	0	1.36	136	28	15.1384	1	11.73	7.13	21.1126	57	67	0.850746	0.419118	29	42	105	3	29	9.5	43.898	14	14	14	3	3	3	2	2	2	2	1	2	1	2	1	2	3	0	2	1	3	4	1	1	1	1
420	1	2	10	1	1.27	127	24	14.88	1	7.36	6.4	14.9416	53	60	0.883333	0.417323	34	52	150	19	41	10.5	48.672	14	14	14	3	2	3	3	2	2	3	2	3	2	2	3	1	2	2-karate,ping-pong	2	3	2	3	1	1	2	2
421	1	2	10	1	1.33	133	29	16.3944	1	7.7	6.33	15.2683	56	66	0.848485	0.421053	27	46	125	7	19	9	41.511	16	16	16	2	2	3	2	2	2	2	2	2	1	2	3	1	2	0	2	2	1	1	2	1	1	2
422	1	2	10	0	1.44	144	36.5	17.6022	1	14.8	10.8	29.268	65	73	0.890411	0.451389	29	30	95	0	13	8.5	39.124	15	15	15	2	2	3	2	2	2	2	2	2	2	2	1	2	2	0	2	2	3	2	1	1	1	1
423	1	2	10	0	1.41	141	29	14.5868	0	7.93	5.73	14.8206	57	66	0.863636	0.404255	23	40	90	2	14	8.5	39.124	16	18	17	2	2	3	2	2	2	2	2	2	2	2	2	2	2	2-hula-hop	2	1	2	2	1	1	1	2
424	1	2	10	1	1.42	142	39	19.3414	1	10.6	6.93	19.5033	60	76	0.789474	0.422535	31	52	155	16	36	10	46.285	16	15	15.5	2	2	3	2	2	2	2	2	2	1	2	2	1	1	2-karate,ping-pong	4	1	1	1	1	1	1	1
425	1	2	10	0	1.37	137	32.5	17.3158	1	10.4	10.9	24.065	57	73	0.780822	0.416058	29	48	100	3	19	9	41.511	15	14	14.5	3	3	3	2	2	2	2	3	3	1	2	1	3	3	2-karate,ping-pong	2	1	5	3	2	1	1	2
426	1	2	10	0	1.47	147	48	22.213	2	20.6	17.13	43.9453	74	83	0.891566	0.503401	24	30	78	0	14	8.5	39.124	18	15	16.5	2	2	3	2	2	3	2	2	3	2	2	1	3	3	3-hula-hop	3	1	3	1	2	1	1	3
427	1	2	10	0	1.45	145	31	14.7444	1	19.93	18.2	44.4293	67	89	0.752809	0.462069	27	37	165	2	12	8.5	39.124	27	27	27	2	2	3	1	3	3	2	2	2	2	2	2	3	2	0	3	3	4	1	2	2	3	3
428	1	2	10	1	1.5	150	55	24.4444	3	25.33	23.26	57.0859	74	92	0.804348	0.493333	25	32	85	4	16	9	41.511	20	24	22	2	3	2	2	3	3	3	2	3	2	2	2	1	2	2-piłkaręczna	2	3	2	2	1	1	1	1
429	1	2	10	1	1.42	142	30.5	15.126	1	9.56	6.6	17.8456	58	65	0.892308	0.408451	24	36	100	8	12	8.5	39.124	17	15	16	2	2	2	3	2	2	2	1	2	2	2	2	1	2	2-klockilego	3	1	2	2	2	1	1	2
430	3	1	14	0	1.6	160	44.3	17.3047	1	10.3333	8	20.4753	60	82	0.731707	0.375	43	46	200	10	34	10	39.437	30	26	28	2	2	3	2	2	3	2	2	3	2	2	2	3	3	3łyżwy	1	1	1	1	2	1	1	2
431	3	1	14	1	1.64	164	61.3	22.7915	2	9	8.33333	19.2653	76	93	0.817204	0.463415	27	30	200	37	42	10.5	42.1312	40	40	40	1	1	1	1	3	1	1	1	1	1	2	2	1	1	3snowbard	5	5	1	5	1	1	1	2
432	3	1	14	1	1.68	168	52	18.424	1	6	7.33333	14.4253	70	90	0.777778	0.416667	21	58	230	27	60	11.5	47.5196	48	48	48	2	2	3	2	2	2	1	1	1	2	1	1	1	1	0	4	4	2	3	0	0	1	1
433	3	1	14	0	1.59	159	61.5	24.3266	2	28.6667	22.3333	60.002	80	96	0.833333	0.503145	34	29	140	0	13	8.5	31.3544	34	34	34	2	2	1	1	2	2	2	1	2	2	1	2	2	2	0	2	3	1	2	1	1	2	2
434	3	1	14	1	1.53	153	46	19.6506	1	11	8.33333	21.6853	72	79	0.911392	0.470588	26	31	200	9	58	11.5	47.5196	26	26	26	2	2	2	2	3	3	1	2	1	2	2	2	3	1	2siłownia	5	4	1	1	1	1	1	2
435	3	1	14	1	1.54	154	45	18.9745	1	12	6.33333	20.4753	69	81	0.851852	0.448052	40	53	200	17	4	8	28.6602	32	30	31	3	3	2	3	2	3	2	2	2	2	2	2	2	1	0	3	3	2	1	2	0	1	2
436	3	1	14	1	1.64	164	64	23.7954	2	8.66667	9.33333	20.072	75	91	0.824176	0.457317	43	55	225	34	43	10.5	42.1312	48	46	47	3	3	2	2	2	2	1	2	2	2	2	2	1	1	3siłownia	2	4	3	4	1	1	1	1
437	3	1	14	0	1.65	165	42	15.427	0	12.3333	9	24.1053	63	81	0.777778	0.381818	32	32	160	0	16	9	34.0486	24	26	25	2	3	3	2	3	3	3	2	2	3	3	2	3	3	0	3	2	2	4	1	1	2	2
438	3	1	14	1	1.62	162	55.2	21.0334	1	9.33333	8.83333	20.2737	74	87	0.850575	0.45679	35	42	200	25	80	12.5	52.908	35	42	38.5	3	2	2	2	3	3	2	2	1	2	2	3	2	1	0	3	3	1	1	0	0	1	2
439	3	1	14	1	1.51	151	44.3	19.429	1	11	9	22.492	67	79	0.848101	0.443709	32	40	139	0	31	10	39.437	26	24	25	2	3	2	2	2	3	2	2	2	2	2	3	2	2	0	2	3	1	1	4	4	5	3
440	3	1	14	0	1.57	157	46	18.662	1	13	10	26.122	67	80	0.8375	0.426752	40	47	160	20	51	11	44.8254	30	28	29	2	2	2	2	2	2	2	2	2	2	2	1	1	3	0	2	3	2	2	1	1	1	3
441	3	1	14	1	1.71	171	61	20.8611	1	12.6667	9	24.5087	79	91	0.868132	0.461988	15	7	200	4	49	11	44.8254	40	40	40	2	2	2	3	2	3	2	2	3	2	3	2	1	1	3ręczna	4	4	1	3	2	1	2	1
442	3	1	14	1	1.65	165	48	17.6309	1	7.5	7	15.837	66	85	0.776471	0.4	5	20	150	1	19	9	34.0486	30	28	29	2	2	2	1	2	1	1	2	1	2	1	1	1	1	0	5	3	1	1	1	1	1	1
443	3	1	14	0	1.53	153	38.9	16.6175	0	11.6667	8.66667	22.8953	64	73	0.876712	0.418301	17	40	170	17	19	9	34.0486	20	20	20	2	2	2	2	2	3	2	2	2	2	2	2	2	2	0	4	4	3	2	2	3	1	2
444	3	1	14	1	1.58	158	50	20.0288	1	7.5	7.83333	16.8453	66	88	0.75	0.417722	37	60	210	40	73	12	50.2138	32	32	32	2	2	3	3	2	2	1	1	1	1	2	2	1	1	0	4	5	1	1	1	1	1	1
445	3	1	14	1	1.47	147	45	20.8247	1	17	11	32.172	65	87	0.747126	0.442177	27	45	160	9	20	9	34.0486	24	20	22	2	2	3	2	1	3	1	1	1	1	2	2	1	1	0	5	5	1	1	0	1	1	1
446	3	1	14	0	1.62	162	61	23.2434	1	17	15.6667	37.8187	83	95	0.873684	0.512346	48	31	170	1	17	9	34.0486	32	34	33	2	0	2	2	2	2	2	2	2	2	2	2	2	3	0	2	3	1	2	1	1	1	1
447	3	1	14	1	1.56	156	46	18.902	1	18.3333	11	33.7853	66	88	0.75	0.423077	23	44	200	20	53	11	44.8254	30	28	29	3	3	2	3	2	3	2	2	2	3	2	3	2	1	3ręczna	4	4	1	3	2	1	2	1
448	3	1	13	1	1.5	150	60	26.6667	2	26.6666	24.3333	60.0019	82	87	0.942529	0.546667	28	47	140	3	18	9	35.9142	26	25	25.5	2	2	1	2	3	1	1	2	2	2	1	2	1	1	0	1	5	1	2	1	1	1	1
449	3	1	14	0	1.64	164	47.9	17.8093	1	16	14.2	34.834	69	90	0.766667	0.420732	22	36	130	0	16	9	34.0486	22	22	22	1	2	2	2	1	3	1	1	2	2	1	1	1	1	0	3	5	1	1	1	1	3	2
450	3	1	13	0	1.63	163	69	25.9701	2	33	26.8	70.65	71	105	0.67619	0.435583	29	41	100	0	20	9	35.9142	26	26	26	2	2	3	3	2	3	2	3	3	1	1	2	1	3	0	1	1	3	2	1	1	1	1
451	3	1	13	0	1.59	159	43	17.0088	1	11	8.8	22.25	58	84	0.690476	0.36478	29	43	170	6	22	9	35.9142	26	24	25	2	2	3	2	2	2	3	1	3	2	2	1	3	3	3bieginanartach	4	2	3	4	1	1	1	1
452	3	1	13	0	1.65	165	63.3	23.2507	2	22	13.4	41.126	76	96	0.791667	0.460606	37	15	130	0	16	9	35.9142	22	18	20	2	2	3	1	2	3	3	1	3	2	2	2	1	2	0	2	3	2	5	1	1	1	1
453	3	1	13	0	1.53	153	46.3	19.7787	1	10.8	10	23.46	65	88	0.738636	0.424837	41	48	187	4	38	10	41.149	20	22	21	2	2	2	2	2	2	2	2	2	2	1	2	2	2	0	4	3	3	3	1	2	2	2
454	3	1	13	0	1.6	160	53.5	20.8984	1	14.2	11	28.784	68	87	0.781609	0.425	40	46	170	28	52	11	46.3838	30	28	29	2	2	2	2	3	2	2	2	2	3	2	2	2	3	0	3	3	1	2	1	1	1	2
455	3	1	14	1	1.64	164	41.2	15.3183	0	7.6	4.8	13.296	63	77	0.818182	0.384146	25	52	219	22	62	11.5	47.5196	33	28	30.5	3	3	3	3	2	3	2	2	2	3	2	3	2	2	0	3	2	1	2	1	1	1	2
456	3	1	14	1	1.7	170	61.9	21.4187	1	11.4	7.4	21.04	75	93	0.806452	0.441176	35	48	185	20	52	11	44.8254	36	36	36	2	2	2	2	2	2	1	1	1	2	1	2	1	1	0	4	5	1	1	1	1	1	1
457	3	1	14	1	1.76	176	58.1	18.7565	1	9	7.4	18.136	75	93	0.806452	0.426136	29	48	192	24	83	12.5	52.908	42	38	40	2	2	3	2	2	2	1	2	2	2	2	2	2	1	0	1	5	1	1	1	2	1	1
458	3	1	14	1	1.62	162	45.1	17.1849	1	13.6	8	24.428	75	83	0.903614	0.462963	27	44	199	23	89	12.5	52.908	30	26	28	2	3	3	2	2	2	2	2	2	2	2	2	1	1	0	3	4	1	1	2	2	1	2
459	3	1	13	1	1.69	169	63.3	22.1631	2	16.8	12.6	33.866	83	95	0.873684	0.491124	36	44	182	14	92	13	56.8534	38	34	36	2	3	3	2	2	3	1	2	2	2	2	3	2	1	0	3	2	1	3	1	1	1	1
460	3	1	14	0	1.65	165	40	14.6924	0	10.2	6.6	18.62	61	76	0.802632	0.369697	33	40	151	3	31	10	39.437	24	21	22.5	2	3	3	2	2	2	2	2	2	2	2	3	2	2	0	2	1	2	3	1	1	1	2
461	3	1	14	1	1.81	181	120.3	36.7205	3	28.6	39.2	80.33	115	127	0.905512	0.635359	29	47	171	16	26	9.5	36.7428	44	47	45.5	2	3	2	2	1	2	1	1	1	1	1	3	2	1	3przysiady	4	5	2	5	2	2	1	1
462	3	1	13	1	1.62	162	52	19.8141	1	16	12.4	32.656	79	90	0.877778	0.487654	15	44	148	12	55	11	46.3838	30	28	29	2	3	3	2	2	3	2	2	3	2	2	2	2	1	0	2	3	1	3	2	2	1	1
463	3	1	13	1	1.49	149	36	16.2155	1	6.6	6	13.538	65	75	0.866667	0.436242	38.5	45	173	30	69	12	51.6186	26	28	27	2	3	2	2	2	3	2	2	2	2	2	3	2	2	0	3	5	2	3	1	1	2	1
464	3	1	14	1	1.8	180	70.1	21.6358	1	11	9.5	23.097	79	98	0.806122	0.438889	27	51	222	35	70	12	50.2138	54	52	53	2	2	2	1	2	2	1	2	1	2	1	2	1	1	0	3	3	1	1	1	1	2	1
465	3	1	13	1	1.7	170	59.5	20.5882	1	12.4	13.3	29.389	76	85	0.894118	0.447059	26	38	140	13	22	9	35.9142	34	26	30	2	2	1	1	3	2	1	2	1	2	2	2	1	1	0	4	5	1	4	1	1	2	1
466	3	1	13	1	1.57	157	45	18.2563	1	11.2	6.9	20.193	66	78	0.846154	0.420382	22	44	150	9	34	10	41.149	25	22	23.5	2	2	2	1	2	2	2	2	2	2	2	2	1	1	0	3	3	1	1	1	1	1	1
467	3	1	14	0	1.58	158	36.8	14.7412	0	5.9	3.5	9.666	60	77	0.779221	0.379747	21	31	170	17	36	10	39.437	18	23	20.5	3	2	3	3	2	3	2	2	3	3	2	1	3	1	0	5	2	1	5	1	2	4	1
468	3	1	14	1	1.62	162	54.7	20.8429	1	9.6	6.9	18.257	75	86	0.872093	0.462963	26	49	180	21	58	11.5	47.5196	32	23	27.5	3	2	3	2	2	3	1	2	3	3	2	3	2	2	0	2	4	1	2	1	1	1	1
469	3	1	14	1	1.74	174	53.6	17.7038	1	6.3	4.9	11.844	73	88	0.829545	0.41954	41	52	210	41	32	10	39.437	32	30	31	3	3	2	2	2	2	2	2	2	2	2	3	2	1	0	3	5	1	1	1	1	1	1
470	3	1	13	1	1.65	165	43	15.7943	0	10.9	8.1	21.282	61	78	0.782051	0.369697	22	36	157	1	20	9	35.9142	25	25	25	2	2	3	1	1	2	1	2	2	2	1	2	1	2	0	4	5	2	5	1	1	1	1
471	3	1	14	0	1.6	160	43.3	16.9141	1	8.8	6.3	16.563	66	84	0.785714	0.4125	14	44	156	27	42	10.5	42.1312	27	25	26	2	3	3	2	2	3	2	2	3	2	2	2	2	3	2łyżwy	4	3	1	2	1	1	2	2
472	3	1	13	1	1.6	160	41.8	16.3281	1	6.5	4.3	11.36	71	77	0.922078	0.44375	21	60	176	40	60	11.5	49.0012	28	28	28	3	2	1	2	3	2	1	3	2	3	2	3	2	1	0	1	2	1	4	2	1	1	4
473	3	1	14	0	1.6	160	40.9	15.9766	0	5.3	6.7	12.812	63	78	0.807692	0.39375	25	45	170	8	24	9.5	36.7428	22	24	23	3	2	3	2	2	3	2	2	2	2	2	2	2	2	0	3	2	4	1	1	2	1	2
474	3	1	14	0	1.67	167	54.5	19.5418	1	13.6	6.1	22.129	68	82	0.829268	0.407186	37	46	136	6	26	9.5	36.7428	28	26	27	3	2	3	2	2	2	1	2	3	3	2	2	2	3	0	3	3	1	3	2	1	2	1
475	3	1	13	1	1.77	177	69.4	22.152	2	12.5	10	25.517	83	99	0.838384	0.468927	30	52	202	29	60	11.5	49.0012	44	42	43	3	3	3	2	3	3	2	3	2	2	2	2	1	1	0	1	5	2	4	2	1	1	1
476	3	1	13	1	1.67	167	53.5	19.1832	1	10.6	11.2	24.67	75	88	0.852273	0.449102	22	54	162	6	43	10.5	43.7664	32	28	30	2	3	2	2	3	2	2	2	3	2	2	2	1	1	0	2	4	2	2	1	1	1	2
477	3	1	13	1	1.69	169	57.5	20.1323	1	10.6	14.6	28.784	77	85	0.905882	0.455621	20	38	153	12	19	9	35.9142	35	28	31.5	2	2	2	2	2	2	1	2	2	2	2	2	1	2	0	1	2	1	1	1	1	1	5
478	3	1	13	0	1.57	157	42	17.0392	1	9.7	6	17.289	65	82	0.792683	0.414013	28	49	152	26	36	10	41.149	24	24	24	2	2	3	3	2	2	2	2	2	2	3	2	2	3	0	2	2	3	4	1	2	1	1
479	3	1	13	0	1.65	165	45.3	16.6391	1	11.5	6.1	19.588	68	80	0.85	0.412121	42	52	199	14	46	10.6	44.2899	30	28	29	2	2	2	2	2	3	1	2	2	2	2	2	1	2	0	4	5	2	5	1	2	1	2
480	3	1	13	0	1.55	155	46.8	19.4797	1	15.3	10.2	29.147	66	80	0.825	0.425806	28	48	140	7	20	9	35.9142	28	24	26	2	2	2	1	2	2	1	2	2	2	2	2	1	1	3granakinect	4	2	1	1	1	1	1	1
481	3	1	13	1	1.69	169	61.7	21.6029	1	23.5	18.5	49.112	89	95	0.936842	0.526627	11	23	114	4	11	8.5	33.2968	29	30	29.5	2	2	3	2	2	2	1	2	1	2	2	2	1	1	0	3	2	1	1	1	1	1	1
482	3	1	13	0	1.67	167	68.1	24.4182	2	14.3	16.9	36.044	80	96	0.833333	0.479042	34	40	144	13	24	9	35.9142	32	22	27	2	2	1	1	1	2	1	2	1	2	2	1	1	1	0	3	5	4	5	3	2	3	1
483	3	1	13	1	1.49	149	59.9	26.9808	3	13.4	16.4	34.35	87	96	0.90625	0.583893	43	41	150	4	26	9.5	38.5316	32	30	31	3	2	3	2	2	2	2	2	2	2	2	2	2	2	2łyżwy	1	3	2	3	1	1	1	3
484	3	1	13	0	1.63	163	45.2	17.0123	1	16	7	26.122	67	82	0.817073	0.411043	26	49	157	6	20	8.5	33.2968	30	30	30	2	2	3	2	2	2	2	2	2	2	2	2	2	1	0	1	2	3	3	1	1	1	2
485	3	1	14	1	1.69	169	55.3	19.3621	1	19	15	39.432	82	90	0.911111	0.485207	19	37	163	10	26	9.5	36.7428	28	26	27	2	2	2	2	2	2	2	2	2	2	2	3	1	1	0	2	1	1	1	1	1	1	1
486	3	1	13	0	1.7	170	66	22.8374	2	17.6	14.8	37.496	73	95	0.768421	0.429412	43	26	137	1	23	9	35.9142	32	30	31	3	2	3	2	2	3	2	2	3	3	2	1	2	3	0	3	3	2	3	1	1	2	1
487	3	1	13	0	1.65	165	58.9	21.6345	1	15.2	8.9	27.453	78	93	0.83871	0.472727	20	40	117	3	20	8.5	33.2968	26	24	25	3	2	3	2	2	3	2	2	2	3	2	2	3	3	3zapasy	4	2	1	1	1	2	2	3
488	3	1	13	0	1.58	158	37.4	14.9816	0	7.6	9.4	18.862	58	81	0.716049	0.367089	32	44	132	5	22	8.5	33.2968	27	25	26	2	2	2	2	2	2	1	2	2	2	2	1	1	2	0	3	4	1	2	1	1	2	1
489	3	1	13	1	1.7	170	72	24.9135	2	27.8	19.8	55.888	90	103	0.873786	0.529412	35	47	166	0	42	10.5	43.7664	34	35	34.5	2	2	2	2	2	2	1	1	1	1	2	2	1	1	0	3	2	1	1	3	1	1	2
490	3	1	13	0	1.62	162	42.8	16.3085	1	13.8	7.8	24.428	61	81	0.753086	0.376543	39	47	142	10	20	9	35.9142	27	27	27	2	3	2	1	2	3	2	2	3	3	2	1	2	1	0	3	5	3	2	1	1	1	2
491	3	1	13	1	1.77	177	55	17.5556	1	6.2	6.9	14.143	84	87	0.965517	0.474576	19	53	225	27	76	12	51.6186	37	35	36	2	3	3	2	3	3	1	3	2	3	2	2	2	1	3siłownia	3	3	2	1	1	1	1	2
492	3	1	13	0	1.64	164	49.5	18.4042	1	14.6	14	32.898	70	88	0.795455	0.426829	27	37	162	9	22	9	35.9142	28	29	28.5	2	1	3	2	2	2	1	2	2	2	2	1	3	2	0	5	4	1	2	1	2	3	2
493	3	1	13	1	1.72	172	56.3	19.0306	1	14	9.9	27.211	74	89	0.831461	0.430233	32	50	174	15	51	11	46.3838	43	43	43	2	2	1	2	2	3	1	2	2	2	2	2	1	1	0	2	4	2	3	2	1	3	2
494	3	1	14	0	1.75	175	41.9	13.6816	0	12.3	12.4	28.179	66	85	0.776471	0.377143	24	26	139	0	42	10.5	42.1312	32	30	31	2	2	3	2	2	2	2	2	2	2	2	2	2	2	0	2	3	1	2	1	1	1	1
495	3	1	14	0	1.61	161	50.8	19.598	1	11.1	9.4	23.097	65	91	0.714286	0.403727	33	41	130	0	42	10.5	42.1312	24	25	24.5	2	2	3	1	2	2	2	2	2	2	2	1	2	1	0	4	4	2	5	1	1	1	3
496	3	1	14	0	1.61	161	45.2	17.4376	1	14.3	9.2	26.727	67	83	0.807229	0.416149	28	47	138	0	32	10	39.437	22	20	21	2	2	2	2	2	3	2	2	3	2	2	2	2	2	0	2	3	2	5	1	2	2	1
497	3	1	13	1	1.81	181	74.1	22.6184	2	13.4	15	32.656	90	100	0.9	0.497238	23	43	212	20	42	10.5	43.7664	44	37	40.5	1	2	1	1	2	2	1	3	2	1	2	2	1	1	0	4	5	1	5	1	1	1	2
498	3	1	13	1	1.71	171	48	16.4153	1	15.4	7	25.396	71	80	0.8875	0.415205	21	44	148	10	35	10	41.149	25	22	23.5	3	2	2	3	2	2	2	2	2	2	3	2	2	1	0	1	5	3	2	1	1	1	2
499	3	1	13	1	1.53	153	42.1	17.9845	1	14.6	9	26.848	81	85	0.952941	0.529412	26	44	188	30	76	12	51.6186	28	25	26.5	2	3	2	2	2	3	2	3	3	2	2	3	2	2	3brzuszki,pompki	1	2	2	1	3	2	1	3
500	3	1	13	1	1.68	168	53.5	18.9555	1	10.4	8.6	21.282	88	80	1.1	0.52381	33	43	200	17	42	10.5	43.7664	30	25	27.5	2	2	1	2	2	3	1	2	2	3	2	2	1	1	0	1	2	1	2	1	1	1	1
501	3	1	14	0	1.68	168	56.6	20.0539	1	13.7	10.3	27.332	65	82	0.792683	0.386905	40	47	143	13	29	9.5	36.7428	32	29	30.5	2	3	3	3	2	3	2	2	2	2	3	2	2	2	0	3	3	2	3	1	1	2	1
502	3	1	13	1	1.6	160	50.1	19.5703	1	9.4	6.6	17.652	67	82	0.817073	0.41875	29	62	158	18	35	10	41.149	27	28	27.5	2	2	2	2	3	2	2	2	2	2	2	2	2	2	0	3	5	1	5	5	1	2	2
503	3	1	13	1	1.65	165	44	16.1616	1	9.6	6.5	17.773	67	80	0.8375	0.406061	31	46	161	18	36	10	41.149	28	29	28.5	2	3	3	2	2	3	2	2	1	3	2	2	2	1	2karate	4	4	1	2	2	1	1	2
504	3	1	14	1	1.73	173	57.2	19.1119	1	7.4	6.9	15.595	73	87	0.83908	0.421965	20	37	153	28	34	10	39.437	35	29	32	2	2	3	2	1	2	2	2	1	2	1	2	1	1	3judo	4	5	5	3	1	1	1	2
505	3	1	13	1	1.58	158	57.2	22.913	2	18	11.2	33.624	79	88	0.897727	0.5	29	51	125	20	19	9	35.9142	27	26	26.5	2	2	2	2	2	2	2	2	2	2	2	2	2	1	0	2	5	1	4	2	1	2	1
506	3	1	13	1	1.8	180	52.2	16.1111	1	8.4	7.8	17.894	70	85	0.823529	0.388889	23	38	140	28	25	9.5	38.5316	28	25	26.5	2	2	3	2	2	3	2	2	2	2	2	2	2	1	0	2	3	3	3	1	1	1	1
507	3	1	13	1	1.68	168	73.4	26.0062	2	18.6	17.5	41.973	89	99	0.89899	0.529762	34	18	100	14	22	9	35.9142	31	26	28.5	2	1	3	2	1	2	2	1	1	1	1	2	1	1	0	2	3	2	2	2	1	1	2
508	3	1	13	1	1.77	177	73.9	23.5884	2	21.2	22.4	51.048	92	100	0.92	0.519774	9	21	133	0	15	9	35.9142	27	28	27.5	2	2	2	2	3	2	2	2	1	1	1	2	2	1	2unihokej	3	4	3	2	2	2	1	2
509	3	1	13	0	1.63	163	48	18.0662	1	12.4	9.6	24.912	69	80	0.8625	0.423313	32	40	110	3	11	8.5	33.2968	30	25	27.5	2	2	2	1	1			2	2	2	1	1	1	2	0	4	3	2	2	2	1	3	2
510	3	1	13	1	1.7	170	51.9	17.9585	1	16.4	8	27.816	73	82	0.890244	0.429412	32	51	195	8	52	11	46.3838	28	27	27.5	2	2	2	2	2	2	2	2	2	3	2	3	2	2	0	2	4	2	3	1	1	1	2
511	3	1	13	0	1.59	159	51.4	20.3315	1	20.2	21.2	48.386	73	86	0.848837	0.459119	31	36	105	0	15	9	35.9142	27	22	24.5	2	2	2	2	2	3	3	2	2	2	2	2	3	3	0	3	2	1	3	4	1	1	1
512	3	1	14	0	1.67	167	48.1	17.2469	1	9.6	8	19.588	69	82	0.841463	0.413174	33	43	118	4	16	9	34.0486	32	26	29	2	3	3	3	2	3	3	3	2	2	2	2	2	3	3gimnastykawieczorna	1	1	2	5	1	1	1	1
513	3	1	13	0	1.64	164	47.2	17.5491	1	11.4	11.2	25.638	73	83	0.879518	0.445122	25	48	100	0	12	8.5	33.2968	25	22	23.5	2	3	3	3	2	3	2	2	3	3	2	1	3	1	0	5	3	4	2	1	1	3	4
514	3	1	13	0	1.49	149	33.6	15.1345	0	9	8.8	19.83	58	72	0.805556	0.389262	30	48	110	5	12	8.5	33.2968	16	18	17	2	3	3	3	2	3	2	3	3	3	3	2	3	2	3jazdakonna	2	2	2	2	3	2	3	4
515	3	1	13	1	1.77	177	68.3	21.8009	1	19.2	15.4	40.158	85	93	0.913978	0.480226	25	41	171	11	28	9.5	38.5316	32	32	32	2	3	3	1	2	2	1	2	1	3	2	2	1	1	2ćwiczenianaatlasieiwioślarzu	4	3	1	2	1	2	1	1
516	3	1	13	1	1.63	163	42.3	15.9208	1	8.2	6.4	15.958	64	81	0.790123	0.392638	17	47	168	24	28	9.5	38.5316	32	28	30	2	2	3	3	3	2	2	2	2	2	2	2	2	1	0	4	4	1	1	1	1	1	2
517	3	1	14	1	1.725	172.5	56.2	18.8868	1	6.6	8.2	16.2	74	87	0.850575	0.428986	34	20	168	22	52	11	44.8254	40	41	40.5	2	2	3	2	2	2	2	2	1	2	2	2	1	1	0	4	3	2	2	2	2	1	3
518	3	1	14	0	1.67	167	61.2	21.9441	1	20.4	16.6	43.062	77	95	0.810526	0.461078	26	27	115	2	15	9	34.0486	25	22	23.5	2	2	3	2	1	1	1	3	2	1	2	2	1	2	0	3	1	4	3	1	1	2	3
519	3	1	13	1	1.62	162	48.2	18.3661	1	13.4	7.4	23.46	69	85	0.811765	0.425926	33	49	210	32	66	11.5	49.0012	32	28	30	2	2	2	2	2	2	2	2	1	2	2	2	1	1	2tenis	2	2	2	3	1	1	1	2
520	3	1	13	1	1.5	150	48.7	21.6444	1	16.2	11.2	31.446	72	88	0.818182	0.48	37	48	156	15	42	10.5	43.7664	26	25	25.5	2	3	3	2	2	2	2	2	2	2	2	2	2	1	0	2	2	1	1	1	1	1	1
521	3	1	13	0	1.63	163	46.8	17.6145	1	13.8	12.5	30.115	67	85	0.788235	0.411043	33	37	114	5	42	10.5	43.7664	22	22	22	3	2	3	3	2	2	2	2	2	2	3	2	2	2	0	4	3	2	2	2	1	1	1
522	3	1	13	0	1.65	165	52.2	19.1736	1	15	9	27.332	69	86	0.802326	0.418182	24	46	141	6	38	10	41.149	30	26	28	2	1	3	1	1	3	1	2	2	2	2	2	2	3	0	5	3	1	5	1	1	3	1
523	3	1	13	1	1.7	170	47	16.263	1	10.2	7	19.104	63	82	0.768293	0.370588	20	44	137	20	62	11.5	49.0012	32	30	31	2	2	3	2	2	2	2	2	2	2	2	3	2	2	0	2	3	4	4	2	2	2	2
524	3	1	13	0	1.6	160	42.2	16.4844	1	11.6	8	22.008	62	84	0.738095	0.3875	28	43	170	6	52	11	46.3838	26	24	25	2	1	3	3	2	3	3	1	1	2	2	1	2	2	0	4	4	2	2	1	2	1	5
525	3	1	13	1	1.7	170	65.7	22.7336	2	18	19.2	43.304	83.5	93	0.897849	0.491176	25	39	182	30	45	10.5	43.7664	34	32	33	2	2	1	2	2	2	2	1	2	2	2	2	2	2	0	2	2	2	2	1	1	1	1
526	3	1	13	1	1.66	166	48.3	17.5279	1	13.2	7.8	23.702	70	85	0.823529	0.421687	16	46	178	25	56	11	46.3838	32	30	31	2	3	3	2	2	2	1	3	2	2	1	1	1	1	0	2	4	2	1	1	1	1	2
527	3	1	14	1	1.67	167	51.1	18.3226	1	11.6	6.8	20.556	71	90	0.788889	0.42515	28	50	180	18	56	11	44.8254	32	33	32.5	2	3	2	2	2	2	1	3	2	2	2	1	1	2	0	5	5	2	2	1	1	1	1
528	3	1	13	0	1.69	169	49.5	17.3313	1	11.8	14	29.51	67	91	0.736264	0.39645	38	42	165	11	20	9	35.9142	22	20	21	2	2	2	2	2	2	2	1	3	2	2	2	2	1	0	3	3	2	2	1	1	1	2
529	3	1	14	1	1.69	169	68	23.8087	2	18.6	11.8	35.076	98	101	0.970297	0.579882	37	42	188	12	23	9.5	36.7428	37	35	36	2	2	2	1	2	1	1	1	1	1	1	1	1	1	0	3	4	1	3	1	1	3	1
530	3	1	13	0	1.69	169	42.6	14.9154	0	10	6.8	18.62	63	77	0.818182	0.372781	31	39	166	8	22	9	35.9142	36	32	34	3	3	3	3	3	2	2	3	3	2	2	3	2	1	0	3	4	2	5	1	2	1	3
531	3	1	14	1	1.75	175	65.7	21.4531	1	11.2	12.2	26.606	75	96	0.78125	0.428571	36	45	195	25	47	10.5	42.1312	40	44	42	2	2	3	2	2	2	2	3	2	2	2	2	2	2	0	2	2	2	2	1	1	1	1
532	3	1	14	1	1.62	162	49.7	18.9377	1	17.6	8	29.268	77	86	0.895349	0.475309	18	18	147	10	25	9.5	36.7428	22	22	22	2	3	3	2	2	3	2	2	3	2	2	3	2	2	0	2	4	3	2	1	1	1	2
533	3	1	13	1	1.77	177	62.4	19.9176	1	12.8	9	24.67	73	82	0.890244	0.412429	15	53	160	30	31	10	41.149	35	40	37.5	3	2	3	2	2	2	2	2	2	1	2	2	1	3	0	4	5	1	5	1	5	2	1
534	3	1	14	1	1.67	167	58.5	20.976	1	14.2667	11	28.8647	70	84.5	0.828402	0.419162	26	62	178	37	43	10.5	42.1312	34	32	33	2	2	2	2	3	2	2	2	2	2	2	1	2	2	0	4	3	2	3	1	2	2	1
535	3	1	13	0	1.655	165.5	49.5	18.0721	1	13.7333	13.4	31.1233	67	84	0.797619	0.404834	32	70	180	30	31	10	41.149	24	20	22	2	3	2	2	1	3	2	3	1	2	2	3	2	1	0	2	3	2	1	1	1	1	1
536	3	1	13	1	1.66	166	43	15.6046	0	12.3333	9.06667	24.186	70	73	0.958904	0.421687	18	68	196	21	49	11	46.3838	32	30	31	3	2	3	2	2	2	2	2	3	1	2	2	1	1	0	4	5	1	5	1	1	2	1
537	3	1	13	1	1.74	174	54.9	18.1332	1	8.8	7.93333	18.5393	54.5	76	0.717105	0.313218	26	57	140	40	36	10	41.149	38	40	39	2	1	3	2	3	3	1	1	1	2	2	1	1	1	0	4	5	3	4	1	2	1	3
538	3	1	14	1	1.62	162	39.6	15.0892	0	6.73333	4.73333	12.1667	65	72	0.902778	0.401235	22	51	186	29	51	11	44.8254	24	22	23	3	3	3	2	2	3	1	1	2	1	2	3	1	1	0	2	4	2	1	1	0	1	1
539	3	1	13	0	1.64	164	52.7	19.594	1	19.2222	11.0667	34.9416	62	86	0.72093	0.378049	26	67	195	5	31	10	41.149	32	28	30	2	2	2	2	2	2	2	2	2	2	2	3	2	3	0	1	3	1	5	1	1	2	1
540	3	1	13	1	1.77	177	59.1	18.8643	1	10.7333	8.86667	22.008	73	81	0.901235	0.412429	34	70	210	55	72	12	51.6186	39	36	37.5	3	3	3	3	2	3	2	2	2	2	2	3	2	2	0	3	4	1	1	1	1	1	1
541	2	2	12	0	1.47	147	38.2	17.6778	1	18.3333	6.53333	28.3807	61	79	0.772152	0.414966	32	54	134	8	36	10	42.861	22	20	21	3	3	2	2	2	3	2	1	2	2	2	2	2	1	0	2	3	4	4	1	1	2	5
542	2	2	12	0	1.55	155	41	17.0656	1	14.4	8.93333	26.5253	64	85	0.752941	0.412903	28	39	121	3	21	9	37.7798	32	28	30	3	3	0	2	3	2	2	3	2	2	2	2	3	3	3piłkaręczna	1	1	4	1	5	2	1	5
543	2	2	12	0	1.52	152	34.9	15.1056	0	11.7667	7.03333	21.04	59	76	0.776316	0.388158	19	44	146	19	41	10.5	45.4016	23	20	21.5	3	2	2	2	2	3	2	2	2	2	2	2	2	3	0	3	2	2	2	0	2	1	4
544	2	2	12	0	1.5	150	37.9	16.8444	1	11.9667	7	21.2417	62	74	0.837838	0.413333	25	48	180	9	36	10	42.861	23	20	21.5	3	2	2	1	3	3	2	2	3	3	1	2	2	1	0	1	1	2	2	1	1	1	4
545	2	2	12	1	1.41	141	37.7	18.9628	1	11.3333	6.26667	19.588	61	76	0.802632	0.432624	35	53	145	13	24	9.5	40.3204	20	18	19	2	3	2	1	2	3	2	2	2	2	2	3	3	1	0	3	3	2	1	2	2	1	3
546	2	2	12	0	1.57	157	51.8	21.0151	1	19.8667	9.53333	33.866	80	89	0.898876	0.509554	21	43	144	6	27	9.5	40.3204	32	28	30	2	2	3	2	3	3	2	1	2	1	2	1	2	1	3piłkaręczna	2	1	1	2	1	2	1	3
547	2	2	12	0	1.41	141	27.8	13.9832	0	9.33333	7.46667	18.62	66	70	0.942857	0.468085	20	48	96	0	28	9.5	40.3204	16	15	15.5	3	2	2	3	2	3	2	2	2	2	2	1	2	2	3piłkaręczna	2	2	2	3	1	2	1	2
548	2	2	12	1	1.53	153	35.9	15.336	0	8.13333	5.13333	14.3447	63	75	0.84	0.411765	16	47	161	30	50	11	47.9422	30	30	30	3	0	2	2	3	2	2	3	3	3	2	3	2	2	0	2	1	3	3	4	3	3	5
549	2	2	12	0	1.4	140	26.3	13.4184	0	9	8.1	18.983	55	70	0.785714	0.392857	25	47	135	16	46	10.5	45.4016	22	16	19	2	3	3	1	3	3	2	2	2	2	2	2	2	2	0	2	3	3	3	2	2	1	2
550	2	2	12	0	1.51	151	37.6	16.4905	1	15.1333	8.2	26.5253	64	80	0.8	0.423841	16	37	115	3	22	9	37.7798	18	19	18.5	2	3	3	2	3	3	1	1	1	1	1	1	1	1	0	4	3	2	1	1	1	1	1
551	2	2	12	0	1.3	130	29	17.1598	1	10.6	5.53333	17.8133	62	72	0.861111	0.476923	32	48	159	32	26	9.5	40.3204	18	18	18	3	2	3	3	3	3	2	1	2		2	2	1	3	0	2	3	2	2	1	1	1	2
552	2	2	12	0	1.49	149	36.9	16.6209	1	8.46667	6.8	16.7647	63	75	0.84	0.422819	43	55	164	13	50	11	47.9422	24	22	23	3	2	2	2	3	3	2	2	3	1	2	3	1	3	0	2	2	3	3	1	1	1	3
553	2	2	12	0	1.49	149	46.6	20.99	1	20.9	11.5333	37.5363	68	81	0.839506	0.456376	28	50	121	0	21	9	37.7798	26	20	23	3	3	3	1	2	3	2	1	2	3	2	1	2	2	0	2	1	1	2	2	1	1	2
554	2	2	12	0	1.67	167	49.9	17.8924	1	16.6	12.8	33.866	67	88	0.761364	0.401198	34	44	138	0	36	10	42.861	28	24	26	3	2	3	2	3	3	1	3	3	2	2	2	1	3	3piłkaręczna	3	3	2	1	1	1	1	3
555	2	2	12	0	1.62	162	38.2	14.5557	0	10.1333	7.46667	19.588	66	78	0.846154	0.407407	32	28	121	0	18	9	37.7798	24	20	22	2	3	2	2	2	3	3	1	3	3	2	3	2	3	0	3	1	1	5	1	1	1	3
556	2	2	12	1	1.58	158	43.9	17.5853	1	13.1	6.1	21.524	74	82	0.902439	0.468354	16	31	163	28	24	9.5	40.3204	30	28	29	2	2	1	1	3	2	1	1	1	2	2	2	1	1	0	2	3	1	2	1	1	1	1
557	2	2	12	0	1.48	148	46.2	21.092	1	18.6667	11.5	34.7937	68	87	0.781609	0.459459	15	41	121	0	23	9	37.7798	20	22	21	2	3	2	2	3	3	2	1	1	2	1	2	2	1	0	2	3	1	2	1	1	1	2
558	2	2	12	1	1.48	148	39.2	17.8963	1	12	6.93333	21.2013	65	80	0.8125	0.439189	28	48	159	14	55	11	47.9422	26	24	25	3	3	3	2	2	2	2	2	1	2	2	3	2	2	0	2	4	1	1	1	1	2	1
559	2	2	12	0	1.64	164	48.7	18.1068	1	16.4	7.73333	27.4933	75	87	0.862069	0.457317	25	39	160	0	26	9.5	40.3204	25	22	23.5	2	3	1	1	3	3	1	1	3	1	1	3	1	2	0	3	4	2	4	2	1	1	2
560	2	2	12	1	1.52	152	37.7	16.3175	1	14.4667	6.2	23.2987	64	78	0.820513	0.421053	12	38	180	22	20	9	37.7798	20	20	20	2	3	2	2	3	3	2	2	1	2	2	3	1	1	0	4	2	3	2	1	2	4	3
561	2	2	12	0	1.4	140	32.5	16.5816	1	9.6	6.73333	18.0553	62	73	0.849315	0.442857	29	50	148	19	36	10	42.861	23	18	20.5	2	3	3	3	3	3	1	1	2	3	2	2	2	2	0	3	2	3	2	1	1	4	3
562	2	2	12	0	1.61	161	50.9	19.6366	1	18.9667	11.4	35.0357	72	89	0.808989	0.447205	17	50	130	5	46	10.5	45.4016	30	30	30	2	3	3	3	2	3	1	1	1	2	2	2	1	1	0	2	1	2	1	1	1	1	3
563	2	2	12	0	1.6	160	40.4	15.7812	1	14.2	6.93333	23.8633	66	76	0.868421	0.4125	15	46	135	9	36	10	42.861	23	22	22.5	3	2	2	2	2	3	2	2	3	1	1	2	2	3	0	2	2	3	3	1	1	1	3
564	2	2	12	0	1.51	151	48	21.0517	1	22	10.0667	37.0927	73	90	0.811111	0.483444	26	48	131	0	21	9	37.7798	30	28	29	2	2	3	2	2	2	2	1	2	2	2	2	2	1	0	2	3	2	1	1	1	1	2
565	2	2	12	1	1.4	140	41.1	20.9694	1	25.2667	11.4667	42.7393	70	82	0.853659	0.5	17	46	125	34	36	10	42.861	22	20	21	2	3	2	2	2	3	2	2	1	1	2	3	1	1	3piłkaręczna	0	2	1	4	2	1	1	1
566	2	2	12	0	1.55	155	51.8	21.5609	1	16.1333	10.7667	30.841	74	91	0.813187	0.477419	22	38	128	6	34	10	42.861	34	30	32	3	3	2	2	3	3	3	2	3	3	2	3	3	3	3piłkaręczna	2	2	5	5	1	1	3	1
567	2	2	12	1	1.42	142	38	18.8455	1	14.6	8.2	25.88	71	80	0.8875	0.5	36	41	145	7	51	11	47.9422	25	24	24.5	3	3	2	2	3	3	2	2	2	2	2	2	1	2	2	1	2	1	1	2	0	0	1
568	2	2	12	0	1.38	138	26.6	13.9677	0	11	4.73333	17.3293	55	70	0.785714	0.398551	26	55	136	9	46	10.5	45.4016	20	16	18	3	2	2	3	3	3	3	1	3	2	2	2	2	3	0	3	3	22	5	3	3	3	4
569	2	2	12	0	1.35	135	26.4	14.4856	0	10.2	4.86667	16.5227	53	67	0.791045	0.392593	33	52	140	11	44	10.5	45.4016	18	16	17	2	2	3	3	2	3	3	1	3	1	2	2	2	3	0	2	1	1	4	1	1	1	1
570	2	2	12	0	1.34	134	27.7	15.4266	0	9.06667	5.4	15.7967	54	71	0.760563	0.402985	41	44	115	7	42	10.5	45.4016	18	13	15.5	3	2	1	3	3	2	3	1	1	2	3	2	3	3	0	1	2	3	4	2	1	2	3
571	2	2	12	0	1.31	131	24.9	14.5096	0	9.33333	4.4	14.9093	56	65	0.861538	0.427481	30	55	119	18	38	10	42.861	16	16	16	2	2	3	2	2	2	2	1	2	2	1	2	2	2	0	2	1	2	1	2	1	1	2
572	2	2	12	0	1.51	151	38.7	16.9729	1	12.8	6.86667	22.0887	60	80	0.75	0.397351	36	51	156	6	33	10	42.861	20	17	18.5	2	3	2	2	3	3	2	2	3	2	2	2	3	1	0	2	2	1	1	1	1	1	3
573	2	2	12	0	1.54	154	36.5	15.3905	0	11.8	6.33333	20.2333	69	76	0.907895	0.448052	20	42	124	0	23	9.5	40.3204	18	16	17	2	3	3	3	2	3	2	2	2	3	2	2	2	3	0	2	1	4	1	1	1	1	1
574	2	2	12	0	1.45	145	35.9	17.0749	1	14.6667	10.6667	28.9453	67	79	0.848101	0.462069	25	53	135	11	22	9	37.7798	19	16	17.5	2	2	2	2	3	3	2	1	3	1	3	1	2	2	0	2	1	1	2	3	1	1	2
575	2	2	12	1	1.44	144	38.7	18.6632	1	18.8	8.4	31.204	73	79	0.924051	0.506944	22	35	132	7	19	9	37.7798	20	18	19	2	3	1	3	3	2	1	1	2	2	2	3	1	1	0	1	3	1	2	1	1	1	2
576	2	2	12	0	1.43	143	32.5	15.8932	1	11.7	7	20.919	60	73	0.821918	0.41958	18	46	108	4	20	9	37.7798	18	16	17	2	3	2	2	3	3	2	2	2	2	2	2	3	3	0	2	2	3	1	3	1	2	4
577	2	2	12	1	1.44	144	54.4	26.2346	3	20.3333	29.6667	58.792	87	96	0.90625	0.604167	30	40	104	2	16	9	37.7798	20	20	20	2	2	2	3	3	2	1	1	1	2	2	3	2	1	0	2	3	1	1	1	1	3	1
578	2	2	12	0	1.43	143	40.5	19.8054	1	19.8667	12.5333	37.496	77	82	0.939024	0.538462	18	44	85	1	14	8.5	35.2392	18	19	18.5	2	2	3	2	3	3	2	2	2	2	2	2	2	2	0	2	2	3	3	1	1	2	1
579	2	2	12	1	1.32	132	24.1	13.8315	0	6.2	4.2	10.876	58	64	0.90625	0.439394	26	46	113	28	51	11	47.9422	18	16	17	3	3	3	3	3	3	3	3	3	3	3	3	3	2	0	1	1	1	1	1	1	1	1
580	2	2	12	1	1.53	153	36.9	15.7632	1	16.6	5.1	24.549	61	75	0.813333	0.398693	22	52	152	21	51	11	47.9422	26	26	26	3	3	3	3	3	3	3	3	3	3	3	3	2	3	0	4	3	4	5	4	3	1	2
581	2	2	12	1	1.36	136	30.5	16.4901	1	9.66667	6.26667	17.5713	62	71	0.873239	0.455882	32	53	166	35	51	11	47.9422	19	20	19.5	3	3	2	3	3	3	3	2	2	1	3	3	2	1	0	2	4	3	4	2	1	1	2
582	2	2	12	1	1.38	138	31.6	16.5932	1	9.33333	5.96667	16.805	62	70	0.885714	0.449275	13	52	143	26	51	11	47.9422	26	22	24	3	3	2	2	2	3	2	2	1	2	3	3	2	2	0	2	1	4	3	4	5	1	2
583	2	2	12	0	1.41	141	31.5	15.8443	1	13	8.26667	24.0247	59	73	0.808219	0.41844	33	37	89	4	18	9	37.7798	14	14	14	3	2	3	2	2	3	2	2	2	3	3	3	3	3	0	2	5	1	2	1	1	5	1
584	2	2	12	0	1.38	138	30	15.753	1	14.5667	8.86667	26.6463	62	71	0.873239	0.449275	32	48	118	18	44	10.5	45.4016	16	14	15	2	2	3	3	3	3	2	1	3	2	2	2	3	3	0	1	1	1	1	2	2	2	1
585	1	2	10	1	1.49	149	38.6	17.3866	1	10.7333	5.86667	18.378	67	77	0.87013	0.449664	30	42	142	6	35	10	46.285	22	20	21	3	3	3	2	3	3	2	2	1	3	2	3	2	1	0	3	1	1	4	1	1	1	1
586	1	2	10	0	1.44	144	28.9	13.9371	0	11.9333	6.33333	20.3947	56	68	0.823529	0.388889	30	45	122	15	32	10	46.285	16	17	16.5	3	2	3	2	3	2	2	2	2	1	2	2	2	2	2gimnastykaart..	2	1	1	2	2	2	1	2
587	1	2	10	1	1.48	148	40.3	18.3985	1	16.7333	11.4667	32.414	73	82	0.890244	0.493243	31	51	168	30	31	10	46.285	26	24	25	3	3	2	3	3	3	2	3	2	2	2	3	1	1	2narty	3	3	1	1	2	1	1	1
588	1	2	10	0	1.35	135	36.5	20.0274	2	14.6667	9.26667	27.2513	68	82	0.829268	0.503704	35	49	136	22	31	10	46.285	24	22	23	2	2	2	3	3	3	3	1	3	1	2	1	1	1	0	2	1	1	2	1	1	2	2
589	1	2	10	1	1.34	134	33	18.3783	1	12.1667	9.83333	24.912	66	74	0.891892	0.492537	30	42	137	2	30	9.5	43.898	16	14	15	2	2	2	2	2	3	2	2	2	2	2	2	1	1	0	3	3	5	1	3	1	1	3
590	1	2	10	1	1.43	143	40.7	19.9032	2	18.2667	9.4	31.7687	74	84	0.880952	0.517483	34	49	143	0	29	9.5	43.898	27	26	26.5	2	2	1	1	3	2	2	2	2	1	2	3	2	1	0	3	5	2	4	5	1	1	2
591	1	2	9	1	1.38	138	37.5	19.6912	2	20.3333	10	34.9953	70	78	0.897436	0.507246	35	47	132	24	18	9	43.3766	18	16	17	3	3	2	2	3	3	2	2	2	2	2	3	2	1	0	2	1	2	1	2	1	1	2
592	1	2	10	1	1.4	140	28.2	14.3878	0	13.5333	7	23.1373	57	68	0.838235	0.407143	10	44	127	6	22	9	41.511	20	18	19	2	3	2	3	3	3	2	1	1	1	1	3	2	2	0	3	3	1	1	2	1	1	2
593	1	2	10	1	1.39	139	44.1	22.8249	2	21.6667	13.6	40.9647	80	85	0.941176	0.57554	22	35	118	7	18	9	41.511	18	17	17.5	2	2	1	1	2	2	2	1	1	1	1	2	1	1	0	4	2	1	1	5	1	1	2
594	3	1	14	0	1.62	162	50	19.052	1	18.93	14.67	38.948	71	87	0.816092	0.438272	39	64	156	9	60	11.5	47.5196	35	30	32.5	2	2	3	1	2	3	2	2	3	2	1	1	1	2	0	2	3	2	5	1	1	1	1
595	3	1	14	0	1.65	165	64	23.5078	2	22.2	19.7333	49.0313	75	93	0.806452	0.454545	40	52	128	0	32	10	39.437	26	32	29	2	3	3	1	2	2	1	2	2	3	1	1	1	1	0	3	3	4	3	2	1	2	2
596	3	1	14	1	1.81	181	85	25.9455	2	25.5333	12.4667	44.272	89	106	0.839623	0.491713	34	46	188	36	60	11.5	47.5196	42	48	45	2	2	3	2	2	2	2	2	1	2	2	2	1	1	0	0	2	1	1	1	1	1	1
597	3	1	14	1	1.6	160	46	17.9688	1	10.5333	5.66667	17.894	70	81	0.864198	0.4375	29	53	196	32	76	12	50.2138	37	32	34.5	3	3	3	3	2	3	1	3	3	2	2	3	3	2	3sport	1	5	4	4	0	1	2	1
598	3	1	14	0	1.53	153	45	19.2234	1	21.1333	21.0667	49.354	67	85	0.788235	0.437908	38	54	149	16	64	11.5	47.5196	30	27	28.5	2	1	3	3	1	2	1	2	2	2	2	1	1	2	0	1	4	4	2	2	2	1	2
599	3	1	14	0	1.52	152	42	18.1787	1	12.2	10.1333	25.3153	68	76	0.894737	0.447368	25	60	184	31	48	10.5	42.1312	28	26	27	2	2	2	1	2	2	1	2	2	2	2	2	2	1	2jazdakonna	1	2	1	1	1	1	1	1
600	3	1	14	0	1.68	168	56	19.8413	1	19.6	15.3333	40.5613	72	94	0.765957	0.428571	19	49	156	0	19	9	34.0486	28	25	26.5	2	2	3	3	1	2	1	2	2	2	1	1	2	2	2jazdakonna	1	3	2	2	1	1	1	2
601	3	1	14	0	1.67	167	55	19.721	1	13.0667	10.0667	26.2833	67	97	0.690722	0.401198	27	48	119	5	41	10.5	42.1312	33	35	34	2	2	2	2	3	2	1	2	3	2	3	1	1	1	0	1	1	4	1	1	1	1	2
602	3	1	14	1	1.73	173	97	32.41	3	32	36.4	81.056	98	112	0.875	0.566474	23	50	153	0	31	10	39.437	35	30	32.5	2	3	3	2	2	3	1	2	1	2	1	3	1	1	0	2	5	3	5	1	1	1	3
603	3	1	14	1	1.67	167	61	21.8724	1	10.4667	9.2	22.0887	72	92	0.782609	0.431138	17	48	188	3	43	10.5	42.1312	49	45	47	2	3	3	2	2	2	2	2	2	2	2	1	1	1	0	1	5	3	3	1	1	1	2
604	3	1	14	1	1.64	164	59	21.9363	1	15.2	11.7333	30.8813	74	90	0.822222	0.45122	22	53	200	33	70	12	50.2138	44	50	47	2	2	3	2	2	2	1	2	1	2	1	1	1	1	2siłownia	1	5	2	2	1	1	1	1
605	3	1	14	1	1.56	156	45	18.4911	1	11.2	7.2	20.556	66	84	0.785714	0.423077	28	63	192	36	35	10	39.437	30	28	29	2	2	3	2	1	3	3	2	2	2	2	3	2	2	0	2	2	4	1	1	1	2	2
606	3	1	14	1	1.71	171	53	18.1252	1	11.3333	8	21.6853	71	83	0.855422	0.415205	22	49	196	31	82	12.5	52.908	34	34	34	2	2	3	1	2	2	1	2	1	2	2	2	1	1	0	3	2	0	0	0	0	1	1
608	3	1	14	1	1.71	171	60	20.5191	1	9.4	8.86667	20.3947	77	89	0.865169	0.450292	24	48	211	52	81	12.5	52.908	40	36	38	2	3	2	1	2	3	2	3	2	2	2	2	1	1	0	3	1	2	1	1	1	2	2
609	3	1	14	1	1.67	167	54	19.3625	1	5.53333	6.33333	12.6507	74	86	0.860465	0.443114	35	56	223	41	82	12.5	52.908	38	42	40	2	3	2	2	3	3	2	2	2	2	2	2	2	1	0	1	5	1	3	1	1	1	1
610	3	1	14	1	1.73	173	59	19.7133	1	12.8	6.46667	21.6047	76	92	0.826087	0.439306	22	54	173	55	69	12	50.2138	32	36	34	2	3	3	2	3	3	1	3	2	2	1	3	0	1	3lacrosse	2	5	2	5	3	1	1	1
614	3	1	14	0	1.66	166	49	17.782	1	13.4	9.53333	26.0413	66	87	0.758621	0.39759	38	50	150	19	11	8.5	31.3544	32	26	29	3	2	3	3	1	2	1	2	1	2	1	2	1	2	2taekwondo	2	5	1	2	1	2	1	2
615	3	1	14	1	1.69	169	54	18.9069	1	9.8	7	18.62	70	91	0.769231	0.414201	32	51	162	30	78	12	50.2138	32	32	32	3	3	3	3	3	3	3	3	3	3	3	3	3	3	0	1	5	5	1	2	1	1	2
616	3	1	14	1	1.64	164	47	17.4747	1	7	5.6	13.538	64	85	0.752941	0.390244	38	58	179	40	90	13	55.6022	36	34	35	3	2	3	2	2	3	2	1	2	2	2	2	1	1	2taekwondo	2	2	4	2	1	1	1	1
617	3	1	14	0	1.65	165	48	17.6309	1	12.4	9.06667	24.2667	64	86	0.744186	0.387879	26	54	170	5	41	10.5	42.1312	34	32	33	2	2	2	2	2	2	1	2	1	2	1	2	1	1	3szermierka	3	2	1	5	1	1	1	1
618	3	1	14	1	1.72	172	67	22.6474	2	11.4667	8.6	22.5727	76	95	0.8	0.44186	33	52	213	25	72	12	50.2138	48	40	44	2	2	2	2	3	2	1	2	1	2	2	2	1	1	0	2	4	5	4	2	1	1	1
619	3	1	14	1	1.72	172	63	21.2953	1	10.0667	8.2	20.3947	87	97	0.896907	0.505814	30	50	175	32	87	12.5	52.908	40	42	41	3	2	3	3	2	2	1	1	1	2	2	2	1	1	0	1	3	2	3	1	1	1	2
620	3	1	14	1	1.57	157	43	17.4449	1	7.4	5.33333	13.6993	67	77	0.87013	0.426752	30	60	218	37	62	11.5	47.5196	30	28	29	2	3	2	2	2	2	2	2	2	2	2	3	1	1	0	2	2	1	2	1	1	1	2
621	3	1	14	1	1.7	170	56	19.3772	1	14.6	11.2	29.51	72	91	0.791209	0.423529	19	48	150	27	45	10.5	42.1312	34	34	34	2	2	2	2	2	2	1	2	1	2	2	2	1	1	0	2	5	3	1	1	1	1	1
622	3	1	14	1	1.71	171	56	19.1512	1	12.6	12	28.058	80	82	0.97561	0.467836	23	48	159	23	48	10.5	42.1312	28	32	30	2	2	3	0	2	3	1	2	2	2	2	2	1	1	0	2	4	2	2	1	1	1	1
623	3	1	14	1	1.75	175	59	19.2653	1	13.8667	6.33333	22.734	78	90	0.866667	0.445714	28	59	225	57	112	13.5	58.2964	40	40	40	3	2	2	1	2	3	1	2	2	2	3	2	1	1	2judo	1	3	3	2	0	1	1	2
624	3	1	14	1	1.78	178	65	20.5151	1	13.3333	8.93333	25.2347	79	93	0.849462	0.44382	40	52	200	49	89	12.5	52.908	40	34	37	3	2	3	3	3	3	2	3	1	2	3	3	1	1	0	2	5	3	2	1	1	1	1
625	3	1	14	1	1.68	168	66	23.3844	2	15.0667	15	34.6727	90	94	0.957447	0.535714	23	46	140	27	32	10	39.437	30	32	31	2	2	1	2	3	2	1	2	2	2	2	1	1	1	0	4	2	1	3	1	1	1	3
626	3	1	14	0	1.61	161	43	16.5889	0	11.9333	8.73333	23.2987	62	82	0.756098	0.385093	34	44	160	15	30	9.5	36.7428	28	24	26	1	2	2	1	2	2	1	2	2	2	2	1	1	2	2tenis	2	2	4	1	1	1	1	1
627	3	1	14	0	1.6	160	47	18.3594	1	14.9333	9.66667	28.058	75	88	0.852273	0.46875	44	64	198	15	52	11	44.8254	34	32	33	2	2	3	2	2	2	1	2	2	2	2	1	1	2	0	1	2	2	1	1	1	1	1
628	3	1	14	0	1.6	160	49	19.1406	1	15.7333	10.7333	30.3167	65	93	0.698925	0.40625	53	59	188	24	52	11	44.8254	28	26	27	1	2	3	1	2	2	2	2	2	2	2	1	1	2	0	5	1	1	1	1	1	1	2
629	3	1	14	0	1.59	159	51	20.1733	1	16.5333	9.66667	29.994	79	89	0.88764	0.496855	39	46	149	7	61	11.5	47.5196	28	28	28	2	1	3	0	1	0	1	2	2	1	2	1	2	2	2łyżwy	2	5	1	2	1	1	1	1
630	3	1	14	0	1.54	154	39	16.4446	0	7.6	7.6	16.684	57	78	0.730769	0.37013	30	43	183	28	42	10.5	42.1312	28	26	27	2	2	3	3	2	3	2	2	3	2	2	2	2	3	0	4	5	2	4	2	1	1	3
631	3	1	14	0	1.58	158	42	16.8242	0	14.2	8.66667	25.9607	75	84	0.892857	0.474684	27	38	149	1	42	10.5	42.1312	22	24	23	2	1	3	2	1	3	1	1	3	1	2	1	1	2	3trampolina	4	5	2	5	1	1	1	2
632	3	1	14	1	1.5	150	44	19.5556	1	13.0667	9.06667	25.0733	69	87	0.793103	0.46	23	51	175	41	50	11	44.8254	28	24	26	2	2	1	1	2	2	1	2	1	1	1	2	2	1	0	3	4	4	1	1	1	1	3
633	3	1	14	1	1.69	169	88	30.8112	3	37.3333	38.6	90.1713	88	108	0.814815	0.52071	31	48	145	14	54	11	44.8254	38	36	37	3	3	3	3	2		2	2	2	2	2	2	1	1	0	1	2	5	2	1	1	1	1
634	3	1	14	0	1.65	165	65	23.8751	2	17.3333	27	51.9353	84	106	0.792453	0.509091	20	43	147	25	27	9.5	36.7428	30	24	27	2	2	3	2	2	2	1	2	2	2	2	1	2	2	0	1	2	4	3	1	2	2	1
636	3	1	14	0	1.68	168	61	21.6128	1	18.4667	12.6	35.8827	70	98	0.714286	0.416667	34	43	106	17	32	10	39.437	26	26	26	2	2	3	3	2	3	1	2	2	3	2	2	2	2	0	3	5	5	1	1	1	2	3
637	3	1	14	1	1.68	168	54	19.1327	1	9.93333	8.73333	20.8787	77	88	0.875	0.458333	17	48	171	39	62	11.5	47.5196	34	32	33	2	3	3	2	2	3	2	3	1	2	2	2	1	2	0	3	4	3	4	1	1	1	2
638	3	1	14	1	1.69	169	57	19.9573	1	9.86667	11.8	24.5087	86	92	0.934783	0.508876	30	50	157	43	68	12	50.2138	38	36	37	2	2	3	2	2	2	1	2	2	2	2	2	1	2	0	4	4	2	5	1	2	2	2
639	3	1	14	0	1.51	151	38	16.6659	0	16.6667	8.2	28.3807	58	84	0.690476	0.384106	33	46	153	26	42	10.5	42.1312	28	22	25	2	2	3	1	2	2	1	2	2	2	2	2	2	2	2kajaki	2	3	2	2	1	1	1	2
640	3	1	14	0	1.72	172	61	20.6193	1	19.7333	12.2667	37.012	72	92	0.782609	0.418605	33	54	172	15	26	9.5	36.7428	32	32	32	2	1	3	3	2	1	1	1	2	1	2	1	1	1	0	1	1	1	1	1	2	1	1
641	3	1	14	1	1.52	152	54	23.3726	2	20.5333	27.6	56.5333	78	91	0.857143	0.513158	31	44	95	8	24	9.5	36.7428	20	18	19	2	2	3	2	2	2	1	2	1	2	2	2	1	1	0	1	2	3	5	1	1	1	1
642	3	1	14	0	1.59	159	46	18.1955	1	11.8667	7.46667	21.6853	87	82	1.06098	0.54717	33	36	125	1	41	10.5	42.1312	22	26	24	2	2	2	1	2	3	1	2	3	2	2	2	1	2	0	2	2	2	3	1	1	1	2
644	3	1	14	1	1.51	151	38	16.6659	1	6.8	7.2	15.232	58	77	0.753247	0.384106	14	31	112	15	38	10	39.437	24	20	22	2	2	3	2	2	2	2	2	2	2	2	3	2	1	0	1	2	3	1	1	1	1	2
645	3	1	14	1	1.67	167	46	16.494	1	8.33333	5.93333	15.5547	75	85	0.882353	0.449102	37	58	202	28	74	12	50.2138	32	28	30	3	2	3	3	3	3	2	2	2	2	2	2	2	2	2tenis	3	3	2	2	2	1	1	2
646	3	1	14	1	1.7	170	60	20.7612	1	14.2	7.4	24.428	77	91	0.846154	0.452941	35	58	208	42	74	12	50.2138	40	36	38	2	3	2	2	2	3	2	2	2	2	2	3	2	1	0	2	4	2	3	1	1	1	1
647	3	1	14	1	1.56	156	40	16.4366	1	9.2	7.2	18.136	65	78	0.833333	0.416667	27	49	137	28	46	10.5	42.1312	20	18	19	2	2	3	2	3	2	2	2	2	2	2	2	1	1	0	1	2	4	2	1	1	1	1
[truncated: 41 more columns]
